# Optimal Therapy Scheduling Based on a Pair of Collaterally Sensitive Drugs

Nara Yoon, Robert Vander Velde, Andriy Marusyk and Jacob G. Scott

October 13, 2017

## Abstract

Despite major strides in the treatment of cancer, the development of drug resistance remains a major hurdle. To address this issue, researchers have proposed sequential drug therapies with which the resistance developed by a previous drug can be relieved by the next one, a concept called collateral sensitivity. The optimal times of these switches, however, remains unknown.

We therefore developed a dynamical model and study the effect of sequential therapy on heterogeneous tumors comprised of resistant and sensitivity cells. A pair of drugs (*DrugA*, *DrugB*) are utilized and switched in turn within the therapy schedule. Assuming that they are collaterally sensitive to each other, we classified cancer cells into two groups, and explored their population dynamics:  $A_R$  and  $B_R$ , each of which is subpopulation of cells resistant to the indicated drug and concurrently sensitive to the other.

Based on a system of ordinary differential equations for  $A_R$  and  $B_R$ , we determined that the optimal treatment strategy consists of two stages: initial stage in which a chosen better drug is utilised until a specific time point,  $T$ , and afterward; a combination of the two drugs with relative durations (i.e.  $f\Delta t$ -long for *DrugA* and  $(1 - f)\Delta t$ -long for *DrugB* with  $0 \leq f \leq 1$  and  $\Delta t \geq 0$ ). Of note, we prove that the initial period, in which the first drug is administered,  $T$ , is shorter than the period in which it remains effective in lowering total population, contrary to current clinical intuition.

We further analyzed the relationship between population makeup,  $ApB = A_R/B_R$ , and effect of each drug. We determine a specific makeup,  $ApB^*$ , at which the two drugs are equally effective. While the optimal strategy is applied,  $ApB$  is changing monotonically to  $ApB^*$  and then remains at  $ApB^*$  thereafter.

Beyond our analytic results, we explored an individual based stochastic model and presented the distribution of extinction times for the classes of solutions found. Taken together, our results suggest opportunities to improve therapy scheduling in clinical oncology.

## 1 Introduction

Drug resistance is observed in many patients after exposure to cancer therapy, and is a major hurdle in the cancer therapy [1]. Treatment with appropriate chemo- or targeted therapy reliably reduces tumor burden upon initiation. However, resistance inevitably arises, and disease burden relapse [2]. The disease recurrence is visible, at the earliest, when disease burden reaches a threshold of detection, at which first therapy is considered failed and a second line drug is used, to control the disease

36 in more efficient way (see Figure 1 (a)). Redesign of treatment is required to start earlier than the  
 37 time point, not only because the detection threshold is higher than the minimum disease burden,  
 38 but also because first drug could become less efficient as duration of therapy reaches to  $T_{max}$ . In  
 39 this research, we focus on the latter reason and figure out how much earlier we should switch drug  
 40 in advance of  $T_{max}$ , assuming that the former reason is less important ( $t_{DT} - t_o \approx T_{max}$ ).

41  
 42 In preexisting tumor, both resistant and sensitive types of cells against a therapy are thought  
 43 to co-exist even before the beginning of the therapy [3], and the cellular composition is shaped  
 44 according to choices of drugs (diagrammed at Figure 1 (b)). Such alteration of cell populations is  
 45 toward gaining resistant properties against the drug being administered, due to (i) kinetic changes  
 46 affecting DNA synthesis during S-phase [4], (ii) drug induced genetic (point) mutations [5], or  
 47 (iii) phenotypic plasticity and resulting epigenetic modifications [6].

48  
 49 To deal with the resistance developed by a drug, one can prescribe a different drug as a follow-  
 50 up therapy targeting the resistance issue. Researchers have sought specific combinations that induce  
 51 sensitivity, this is the concept of collateral sensitivity [7, 8, 9]. In specific cases, an order of several  
 52 drugs complete a collateral sensitivity cycle [8], and corresponding periodic drug sequence can be  
 53 used in prescription of a long term therapy – though we recently showed that the continued effi-  
 54 cacy of the same cycle is not guaranteed [10]. In this research, we focused on such drug cycling  
 55 comprised by just two drugs, each of which can be used as a targeted therapy treating non-cross  
 56 resistant factors occurring after the therapy of the other drug (diagrammed on Figure 1 (b)).

57

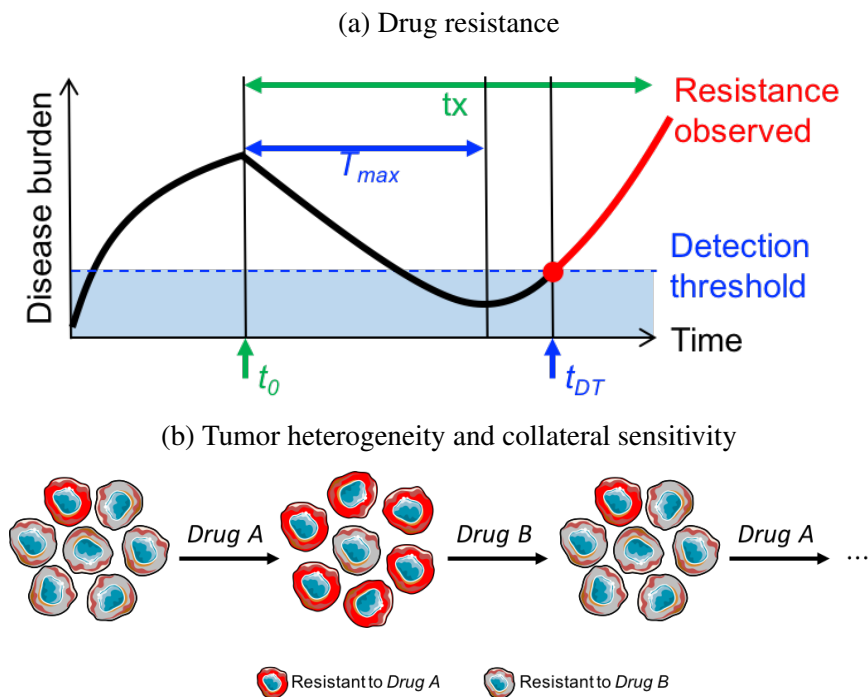

Figure 1: (a) General dynamical pattern of disease burden. It increases initially and then decreases as of the therapy starting point ( $t_o$ ), and eventually rebounds after the maximum period with positive therapy effect ( $T_{max}$ ). Relapse is found, at the earliest, when disease burden reaches detection threshold at  $t_{DT}$ . (b) Change in composition of tumor cell population when a pair of collaterally sensitive drugs are given one after another.

58 The underlying dynamics of resistance development has been studied by looking cell popula-

59 tions mixed by sensitive and resistant types against therapy/therapies, whether it is genotypic or  
 60 phenotypic classifications [11]. Additionally, many researchers have accounted for their choices of  
 61 detailed cellular heterogeneities like: (i) stages in evolutionary structures [12, 13], (ii) phases of  
 62 cell cycle [14, 15, 16, 17], or (iii) spatial distribution of irregular therapy effect [18, 19]. Among  
 63 them, many researches (including [11, 15, 16, 20, 21]) studied the effect of a pair of non-cross  
 64 resistant drugs like us, using the Goldie-Coldman model or its variations [12, 21, 22, 23]. Those  
 65 models are basically utilizing population structure of four compartments each of which represents  
 66 subpopulation (i) sensitive to the both drugs, (ii) and (iii) resistant to one of them respectively, or  
 67 (iv) resistant to both.

68  
 69 In this research, we want to propose a simpler modeling structure including only two types  
 70 of subpopulations (see Section 2 for the detail), which is still appropriate in the study of collater-  
 71 ally sensitive drug effect and whose simplicity facilitates mathematical derivations of interesting  
 72 concepts and quantities (see Section 3 for the detail of the analytical derivations). The model we  
 73 propose at Section 2 has a potential to be expanded with other important considerations as well,  
 74 like comparable stochastic simulations described in Section 4 and other future works explained in  
 75 Section 5.

## 76 2 Modeling setup

### 77 2.1 Basic cell population dynamics under a single drug administration

78 Before describing the comprehensive model for collateral sensitive network in Section 2.2, let us  
 79 go over a fundamental modeling structure describing dynamical behavior of cell populations under  
 80 a single drug. Based on the sensitivity and resistance to the therapy, cell population can be split  
 81 into two groups. Then, we call the populations of the sensitive cells and the resistant cells by  $C_S$   
 82 and  $C_R$  respectively, and use total cell population,  $C_P = C_S + C_R$ , in measuring disease burden  
 83 and drug effect.

84  
 85 We account three dynamical events in our model: proliferation of sensitive ( $s$ ) and resistant  
 86 cells ( $r$ ), and transition between the cell types ( $g$ ). Here, net proliferation rate represents combined  
 87 birth and death rate, so can be positive if birth rate is higher than death rate or negative otherwise. It  
 88 is reasonable to assume that, under the presence of drug, sensitive cell population declines ( $s < 0$ ),  
 89 resistant cell population increases ( $r > 0$ ), and  $g > 0$  for transition.

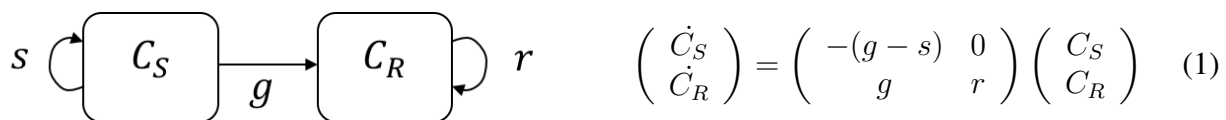

Figure 2: Diagram of dynamics between sensitive cells population,  $C_S$ , and resistant cells population,  $C_R$ , (on the left panel) and the differential system of  $\{C_S, C_R\}$  (on the right panel) with  $s$ —proliferation rate of sensitive cells,  $r$ —proliferation rate of resistant cells,  $g$ —transition rate from  $C_S$  to  $C_R$

91 Figure 2 shows the diagrams of such population dynamics, and the system of ordinary differen-  
 92 tial equations that  $\{C_S, C_R\}$  obey. The solution of the system (1) is

$$\begin{pmatrix} C_S(t) \\ C_R(t) \end{pmatrix} = \begin{pmatrix} e^{-(g-s)t} & 0 \\ \frac{g(e^{rt} - e^{-(g-s)t})}{g+r-s} & e^{rt} \end{pmatrix} \begin{pmatrix} C_S^0 \\ C_R^0 \end{pmatrix} \quad (2)$$

93 where  $\{C_S(0), C_R(0)\} = \{C_S^0, C_R^0\}$ . By (2), total population is

$$C_P(t) = \left( \frac{r-s}{g+r-s} C_S^0 \right) e^{-(g-s)t} + \left( \frac{g(C_S^0 + C_R^0) + (r-s)C_R^0}{g+r-s} \right) e^{rt}. \quad (3)$$

95  
96  
97  $C_P(t)$  is a positive function comprised of a linear combination of exponential growth ( $e^{rt}$ ) and  
98 exponential decay ( $e^{-(g-s)t}$ ) with positive coefficients. Despite the limitations of simple expo-  
99 nential growth models [24], we feel it is a reasonable place to start, since the relapse of tumor size  
100 starts when it is much smaller than its carrying capacity which results in almost exponential growth.

101  
102  $C_P$  has one and only one minimum point in  $\{-\infty, \infty\}$ , after which  $C_P$  increases monotonically.  
103 If  $C'_P(0) = sC_S^0 + rC_R^0 \geq 0$ , the drug is inefficient. ( $C_P(t)$  is increasing on  $t \geq 0$ , see an example  
104 on Figure 3 (a)) Otherwise, if  $C'_P(0) < 0$ , the drug is effective in reducing tumor burden at the  
105 beginning, although it will eventually regrow (drug resistance; see an example on Figure 3 (b)).

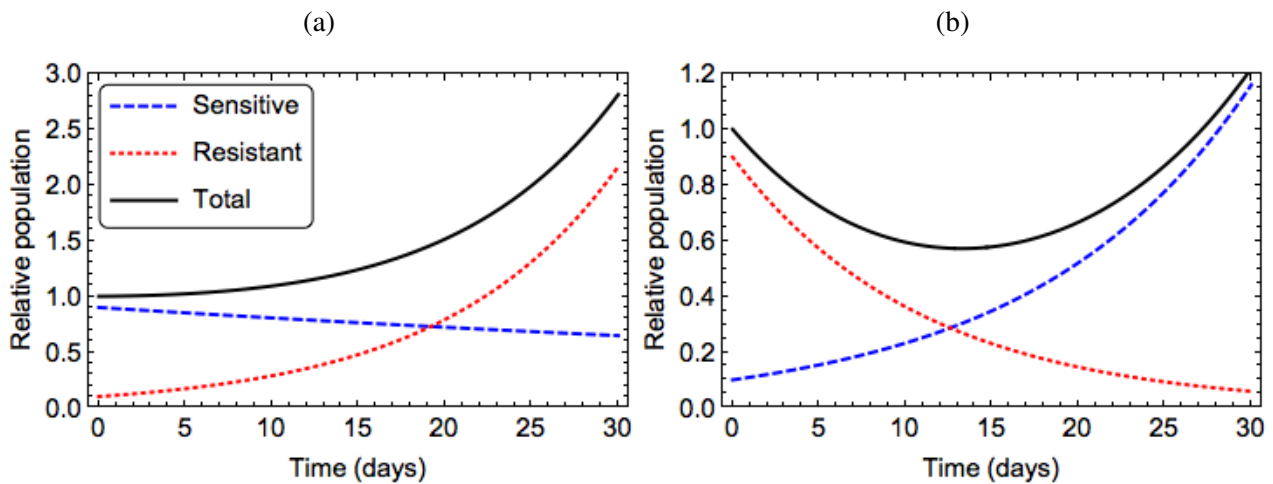

Figure 3: Representative population histories of sensitive and resistant cells and their summation with initial population makeup,  $\{C_S^0, C_R^0\} = \{0.9, 0.1\}$ . (a) increasing total population with  $\{s, r, g\} = \{-0.01, 0.1, 0.001\}$ ;  $C'_P(0) = 0.001 > 0$ . (b) rebounding total population with  $\{s, r, g\} = \{-0.09, 0.08, 0.001\}$ ;  $C'_P(0) = -0.073 < 0$ .

## 106 2.2 Cell population dynamics with a pair of collateral sensitivity drugs

107 Here, we describe the effect of a combined therapy with two drugs switched in turn, by extending  
108 the model for a single-drug administration (System (1)). Assuming that the drugs are collaterally  
109 sensitive to each other, cell population is classified into just two groups reacting to the two types  
110 of drugs in opposite ways. Depending on which drug to be administered, cells in the two groups  
111 will have different proliferation rates and direction of cell-type transition (see Figure 4). That is,  
112 the population dynamics of the two groups follow a piecewise continuous differential system con-  
113 sisting of a series of the system (1), each of which is assigned on a time slot bounded by times of

114 drug-switch.

115

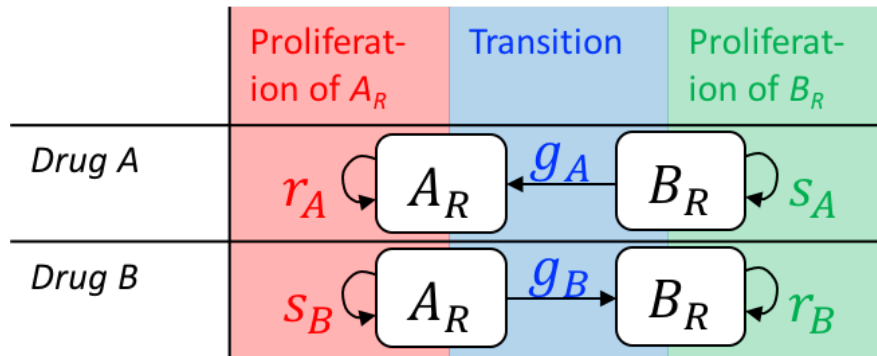

Figure 4: Population dynamics between  $A_R$ – population of cells resistant only to *DrugA* and  $B_R$ – population of cells resistant only to *DrugB* under the presence of *DrugA*, or *DrugB*. For each drug therapy, three drug-parameters of proliferations (colored red and green) and transition (colored blue) are involved.

116 In summary, we assume that

- 117 • there is a pair of collaterally sensitive drugs, *DrugA* and *DrugB*, which are characterized
- 118 by their own model parameters,  $p_A = \{s_A, r_A, g_A\}$  and  $p_B = \{s_B, r_B, g_B\}$  respectively,
- 119 • cell population can be split into two subpopulations,  $A_R$  - resistant to *DrugA* and at the same
- 120 time sensitive to *DrugB*, and  $B_R$  - resistant to *DrugB* and sensitive to *DrugA*, and
- 121 • three types of factors determine the dynamical patterns, (i) drug parameters,  $\{p_A, p_B\}$ , (ii)
- 122 initial population ratio  $ApB_0 = A_R(0)/B_R(0)$  (assuming that  $A_R(0) + B_R(0) = 1$ ), and (iii)
- 123 drug switch schedule.

124 An example of histories of  $\{A_R, B_R, A_R + B_R\}$  with a choice of the three factors is shown at

125 Figure 5.

## 126 3 Analysis on therapy scheduling

### 127 3.1 Drug-switch timing

128 We explored possible strategies on choosing drug switch timing within our modeling setup. The

129 first idea is relevant to clinical intuition: switching drug at the global minimum point of tumor size

130 ( $T_{max}$ ; see Figure 1 (a)), which is shown to exist uniquely in the previous section if and only if

131  $C_R(0)/C_S(0) < -s/r$ . The expression of  $T_{max}$  derived from our model is

$$T_{max}(\{s, r, g\}, RpS_0) = \frac{\ln \left[ \frac{(g-s)(r-s)}{r(g(RpS_0+1) + RpS_0(r-s))} \right]}{g+r-s} \quad \text{with } RpS_0 = \frac{C_R(0)}{C_S(0)}. \quad (4)$$

132  $T_{max}$  depends on (i) the parameters of drug being administered, and (ii) initial population makeup.

133 In the *DrugA*-based therapy, it is  $T_{max}(p_A, ApB_0)$ , and in the *DrugB*-based therapy, it is  $T_{max}(p_B, 1/ApB_0)$ .

134

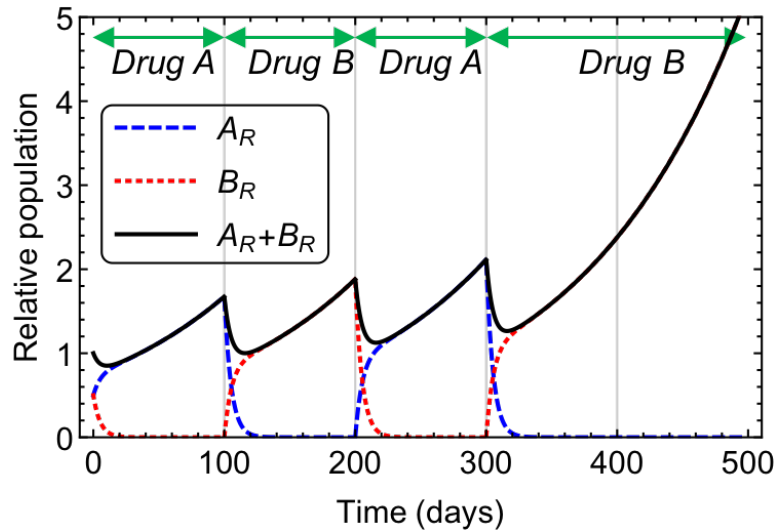

Figure 5: Representative plots describing dynamics of cell populations resistant to *DrugA* ( $A_R$ ), resistant to *DrugB* ( $B_R$ ) and total ( $A_R + B_R$ ) during drug switches. Here,  $p_A = p_B = \{-0.9, 0.08, 0.1\}/\text{day}$  and  $\{A_R^0, B_R^0\} = \{0.5, 0.5\}$ .

135 In addition to  $T_{max}$ , another time point with significant meaning is  $T_{min}$ , explained below. Since  
 136 the decreasing rate is almost zero around  $T_{max}$  with no switch (see the black curve of Figure 5), we  
 137 seek to find a way to expedite the decreasing rate by switching drug before  $T_{max}$ . To decide how  
 138 much earlier to do so, we compared the derivative of  $A_R + B_R$  under constant selective pressure  
 139 (no switch) at an arbitrary time point,  $t_1$ , and compared it to the right derivative of  $A_R + B_R$   
 140 with the drug-switch assigned at  $t_1$ . For example, if the first drug is *DrugA* and the follow-up drug is  
 141 *DrugB*, we compared

$$142 \quad C'_P(t_1 \text{ given } \{s, r, g\} = p_A \text{ and } \{C_S^0, C_R^0\} = \{B_R(t_1), A_R(t_1)\}) \text{ from (3),}$$

143 and

$$144 \quad C'_P(t_1 \text{ given } \{s, r, g\} = p_B \text{ and } \{C_S^0, C_R^0\} = \{A_R(t_1), B_R(t_1)\}) \text{ also from (3).}$$

145 This comparison reveals that the two derivatives are equal at a specific point (this is  $T_{min}$ , see the  
 146 yellow curve on Figure 6), the derivative of drug-switch is lower (higher in absolute value; higher  
 147 decreasing rate) if  $t_1 > T_{min}$  (see the blue and green curves on Figure 6), and the derivative of  
 148 no-switch is lower if  $t_1 < T_{min}$  (see the red curve on Figure 6).

149  
 150  $T_{min}$  depends on the parameters for the first drug  $\{s_1, r_1, g_1\}$  and for the second drug  $\{s_2, r_2\}$ ,  
 151 and initial population ratio between resistant cells and sensitive cells for the first drug  $RpS_0$ . Here,  
 152 transition parameter of second drug ( $g_2$ ), and respective values of the two populations are unneces-  
 153 sary in the evaluation of  $T_{min}$ , which is found to be

$$T_{min}(\{s_1, r_1, g_1\}, \{s_2, r_2\}, RpS_0) = \frac{\ln \left[ \frac{(r_1 - s_1)(r_2 - s_1) + g_1(r_1 + r_2 - s_1 - s_2)}{(r_1 - s_2)(g_1 + RpS_0(g_1 + r_1 - s_1))} \right]}{g_1 + r_1 - s_1}. \quad (5)$$

154 In *DrugA*-to-*DrugB* switch, it is  $T_{min}(p_A, p_B, ApB_0)$ , and in *DrugB*-to-*DrugA* switch, it is  
 155  $T_{min}(p_B, p_A, 1/ApB_0)$ .

156

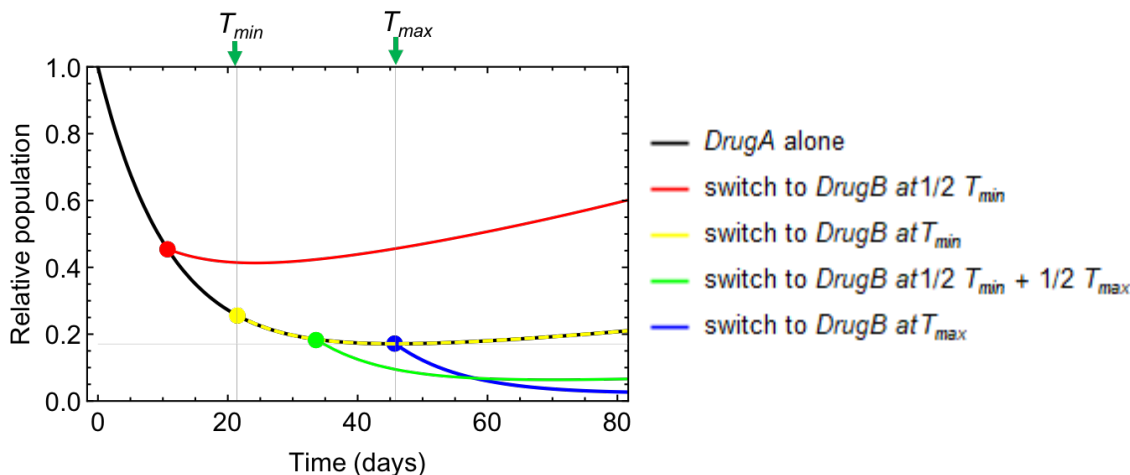

Figure 6: Comparison of total population curves with one-time drug-switch from *DrugA* to *DrugB* at different time points, (i) at  $< T_{min}$  (worse than without-switch; red curve), (ii) at  $T_{min}$  (same as without-switch; yellow curve), (iii) between  $T_{min}$  and  $T_{max}$  (better than without-switch; green curve), and (iv)  $T_{max}$  (better than without-switch; blue curve). Each color of dot/curve represents cell population level on and after drug-switch of each switching strategy. The dashed curve mixed by yellow and black colors represent the yellow and black curves overlapped. Parameters:  $p_A = p_B = \{-0.9, 0.08, 0.001\}/\text{day}$  and  $\{A_R^0, B_R^0\} = \{0.1, 0.9\}$ .

157 An important issue observed in Figure 6 is that the population curve with only one-time drug-  
 158 switch after  $T_{min}$  (and before  $T_{max}$ , assuming that  $T_{min} < T_{max}$ ) is not guaranteed to be lower  
 159 than that of one-time switch at  $T_{max}$  over an entire time range. (i.e., the green curve relevant to the  
 160 switch at  $(T_{min} + T_{max})/2$  and the blue curve relevant to the switch at  $T_{max}$  intersect at  $t \approx 58$   
 161 and the blue curve is lower after the time of the intersection). However, sequential drug switches started  
 162 between  $T_{min}$  and  $T_{max}$  leave a possibility of finding a better drug schedule than the  $T_{max}$ -based  
 163 strategy. Figure 7 shows possible choices of follow up switches (green and black curves) which  
 164 achieve better results than  $T_{max}$ -switch (red curves), unlike the drug-switches started before  $T_{min}$   
 165 remaining less effective (magenta curve).

166  
 167 Optimal drug switch scheme will be discussed in detail in Section 4.2. The optimal scheduling  
 168 for the example of Figure 5 starts with the first drug until  $T_{min}$  (blue curve for  $0 < t \leq T_{min}$ )  
 169 followed by rapid exchange of the two drugs afterward (black curve for  $t > T_{min}$ ). Switching  
 170 before  $T_{max}$ , that is, before the drug has had its full effect, goes somewhat against clinical intuition,  
 171 and is therefore an opportunity for unrealized clinical improvement based on a rationally scheduled  
 172 switch at  $T_{min}$ . In order to realize this however, there are conditions about the order of  $T_{max}$  and  
 173  $T_{min}$  which must be satisfied. In particular:

$$\begin{cases} T_{min} < T_{max} & \text{if and only if } r_{AR}r_B < s_{AS}B \\ T_{min} = T_{max} & \text{if and only if } r_{AR}r_B = s_{AS}B \\ T_{min} > T_{max} & \text{if and only if } r_{AR}r_B > s_{AS}B. \end{cases} \quad (6)$$

174 In our analysis and simulations, we will deal with the cases mostly satisfying  $r_{AR}r_B < s_{AS}B$ , as  
 175 otherwise we cannot expect improvement of clinical strategy using  $T_{min}$ , and more importantly as  
 176 the choice of drugs not satisfying  $r_{AR}r_B < s_{AS}B$  is not powerful to reduce cell population (explained  
 177 in detail in the next section and Figure 8).

178

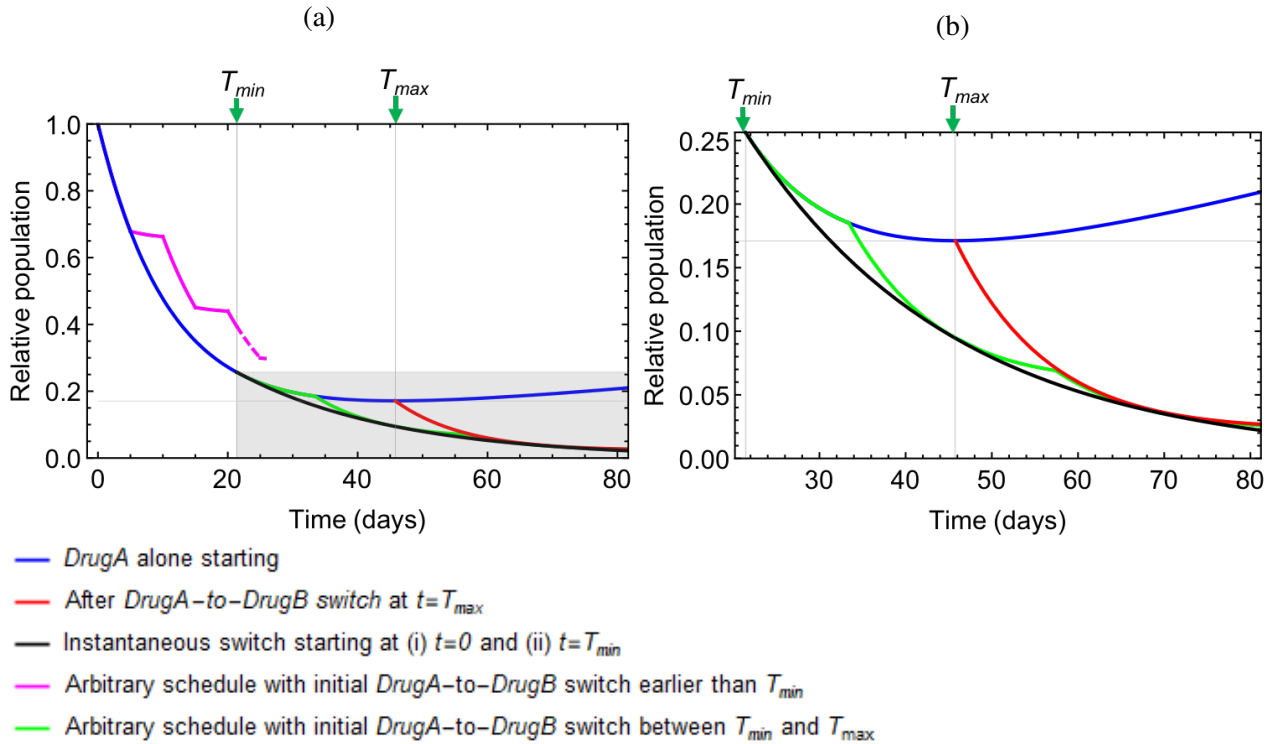

Figure 7: Total population curves with different therapy strategies with  $p_A = p_B = \{-0.9, 0.08, 0.001\}/day$  and  $\{A_R^0, B_R^0\} = \{0.1, 0.9\}$  (a) full range of relative population (b) enlargement of the shaded areas on (a)

179 The difference between  $T_{min}$  and  $T_{max}$  ( $T_{gap}$ ), provides intuition on how much shorter the first  
 180 drug administered than it is used to be.

$$\begin{aligned}
 T_{gap}(\{s_1, r_1, g_1\}, \{s_2, r_2\}) &:= T_{max}(\{s_1, r_1, g_1\}, RpS_0) - T_{min}(\{s_1, r_1, g_1\}, \{s_2, r_2\}, RpS_0) \\
 &= \frac{\ln \left[ \frac{(g_1 - s_1)(r_1 - s_1)(r_1 - s_2)}{r_1((r_1 - s_1)(r_2 - s_1) + g_1(r_1 + r_2 - s_1 - s_2))} \right]}{g_1 + r_1 - s_1} \quad (7)
 \end{aligned}$$

181 We studied sensitivity analysis on  $T_{gap}$  over a reasonable space of non-dimensionalized drug pa-  
 182 rameters in Appendix B. Expectedly, as the proliferation rates under the second drugs increases  
 183 ( $r_2 \uparrow$  and/or  $s_2 \uparrow$ ), the optimal switching timing to the second drug is delayed ( $T_{min} \uparrow$  and  $T_{gap} \downarrow$ ).  
 184 As  $r_1$  increases, both  $T_{min}$  and  $T_{max}$  decrease. However,  $T_{max}$  decrease more than  $T_{min}$  does, so in  
 185 overall  $T_{gap}$  decreases.  $s_1$  and  $T_{gap}$  do not have a monotonic relationship.  $T_{gap}$  is increasing as  $s_1$  is  
 186 increasing in a range of relatively low values, but it turns into decreasing in relatively high values  
 187 of  $s_1$ .

### 188 3.2 Population makeup and drug effect

189 In this section, we study how the degree of cellular heterogeneity and therapy effect are related,  
 190 and checked the roles of  $T_{min}$  and  $T_{max}$  in the relationships. We defined a function of population  
 191 makeup  $ApB$  based on the ratio between the two cell types,

$$192 \quad ApB(t) := \frac{A_R(t)}{B_R(t)}.$$



193 Then, the ratio at  $T_{min}$  with *DrugA*-to-*DrugB* switch ( $T_{min}^A$ ) and with *DrugB*-to-*DrugA* switch  
 194 ( $T_{min}^B$ ) are equivalent.

$$ApB(T_{min}^A) = ApB(T_{min}^B) = \frac{r_B - s_A}{r_A - s_B} := ApB^* \quad (8)$$

195 At  $T_{max}$  with *DrugA* ( $T_{max}^A$ ), and with *DrugB* ( $T_{max}^B$ ), we have

$$196 \quad ApB(T_{max}^A) = \frac{-s_A}{r_A}, \quad ApB(T_{max}^B) = \frac{r_B}{-s_B}$$

197 And, as  $s < 0$  and  $r > 0$ , those values of  $ApB$  are all positive.

198  
 199 We next consider the level of drug effect at each  $ApB$  by taking the derivative of cell popula-  
 200 tion under the presence of the drug. Fixing the total population, the derivative is defined by  $ApB$   
 201 in addition to the model parameters. We define this effect by

$$202 \quad Ef(ApB) := \left. \frac{d}{dt}(A_R(t) + B_R(t)) \right|_{t=0, ApB_0=ApB}^{p_A \text{ or } p_B} \quad \text{with } A_R(0) + B_R(0) = 1.$$

204 The effects of *DrugA* (specified by  $p_A$ ) and *DrugB* (specified by  $p_B$ ) defined in this way are equiv-  
 205 alent at  $ApB^*$ , by the definitions of  $T_{min}$  and  $ApB^*$ . The effect of *DrugA* is larger if  $ApB < ApB^*$ ,  
 206 since the cell population resistant to *DrugA* is relatively smaller than the population of the other  
 207 cell type. Otherwise, *DrugB* has a better effect. At the makeup of  $T_{max}^A$ , *DrugA* has no effect  
 208 on population reduction. If  $ApB$  is getting smaller than that, *DrugA* becomes effective. And, the  
 209 smaller  $ApB$  is, the better effect *DrugA* has. Similarly the effect of Drug B is zero at  $ApB(T_{max}^B)$   
 210 and increases as  $ApB$  increases above  $ApB(T_{max}^B)$  (see Figure 8).

211

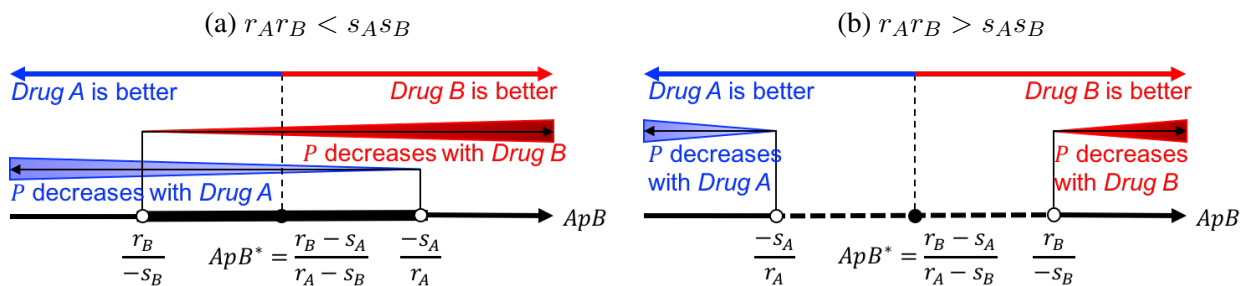

Figure 8: Effect of *DrugA* and *DrugB* over the axis of  $ApB$ . The two drugs have same effect at  $ApB = ApB^*$ , and have no effect at  $ApB = -s_A/r_A$  (in case of *DrugA*) or  $ApB = -r_B/s_B$  (in case of *DrugB*). The drug effect is getting bigger, as  $ApB$  is getting farther from the no-effect level to the direction of getting less cell population resistant to the drug.

212 The population makeup changes in the opposite direction. As *DrugA* (or *DrugB*) therapy  
 213 continues,  $ApB$  continues to increase (or decrease). So, if *DrugA* (or *DrugB*) is given too  
 214 long, it should go through a period of no or almost no effect around  $ApB = -s_A/r_A$  (or around  
 215  $ApB = -r_B/s_B$ ), but once the drug is switched after that, there will be a higher therapy effect with  
 216 *DrugB* (or with *DrugA*). Such two opposite aspect has shown to be balanced by switching drug  
 217 when the population makeup reaches  $ApB^*$ .

218

219 Depending on the condition (6), the order of the three ratios at  $T_{min}$ ,  $T_{min}^A$  and  $T_{max}^B$  changes.  
 220 In particular, if  $r_{A^rB} < s_{A^sB}$ , there exists an interval of  $ApB$ ,  $(-r_B/s_B, -s_A/r_A)$ , in which  
 221 both drugs are effective in decreasing population, given the condition is satisfied. Otherwise, if  
 222  $r_{A^rB} < s_{A^sB}$ , no drug is effective when  $ApB \in (-s_A/r_A, -r_B/s_B)$ . These results are schematized in Figure 8.  
 223

224

### 225 3.3 Optimal scheduling and its clinical implementation

226 In this sections, we describe a drug-switch strategy to achieve the best effect possible with a pair of  
 227 collaterally sensitive drugs. It is numerically found, and consists of two stages.

- 228 • **(Stage 1)** to reach to the population makeup with balanced drug effect ( $ApB^*$ ), so the period  
 229 lasts as long as  $T_{min}$  of the first drug
- 230 • **(Stage 2)** to give the two drugs with a proper ratio in period (represented by  $k$  or  $k'$ ; see Figure  
 231 9) in order to keep  $ApB$  being constant at  $ApB^*$ , and switching them in a high frequency,  
 232 represented by  $\Delta t \approx 0$

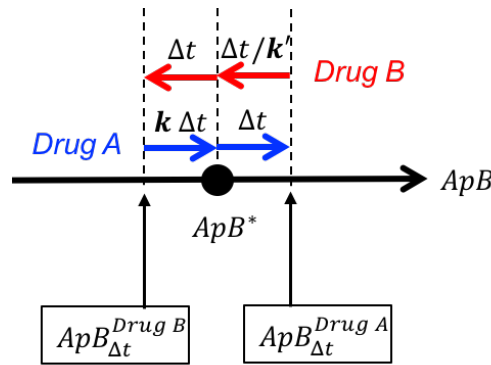

Figure 9: Diagram of the relationship between therapy duration (like  $\Delta t$ ,  $k \Delta t$ , or  $\Delta t/k'$ ) and change in  $ApB$  around  $ApB^*$ .  $\Delta t$  represents an arbitrary time interval (supposed to be small,  $\Delta t \approx 0$ ), and  $k$  represents a specific quantity corresponding to such  $\Delta t$  and parameters of  $DrugA$  and  $DrugB$ .

233 Both  $k$  and  $k'$  represents relative duration of  $DrugA$  compared to duration of  $DrugB$  in Stage  
 234 2. The explicit formulation of  $k$  can be derived from the solution of the differential equations  
 235 (2) by (i) evaluating the level of  $ApB$  after  $\Delta t$ -long  $DrugA$  therapy started with  $ApB(0) =$   
 236  $ApB^*$  ( $ApB_{\Delta t}^{DrugA}$ ), and then, (ii) by measuring the time period taken to achieve  $ApB^*$  back from  
 237  $ApB_{\Delta t}^{DrugA}$  through  $DrugB$  therapy ( $\Delta t'$ ), and finally (iii) taking ratio between the two therapy  
 238 periods ( $k = \Delta t/\Delta t'$ ).  $k$  depends on drug switch frequency and model parameters,

$$k = k(\Delta t, p_A, p_B). \quad (9)$$

Such  $k$  is consistent with  $k'$ , which is the ratio similarly evaluated with  $DrugB$  as first therapy and  $DrugA$  as follow-up therapy, in the optimal case of instantaneous switching,

$$\begin{aligned} \lim_{\Delta t \rightarrow 0} k(\Delta t, p_A, p_B) &= \lim_{\Delta t \rightarrow 0} k'(\Delta t, p_A, p_B) \\ &= \frac{(r_A - s_B)((r_A - s_A)(r_B - s_A) + g_A(r_A + r_B - s_A - s_B))}{(r_B - s_A)((r_B - s_B)(r_A - s_B) + g_B(r_A + r_B - s_A - s_B))} := k^*(p_A, p_B). \end{aligned} \quad (10)$$

239 We studied how sensitive  $k^*$  (or  $f^* = k^*/(1+k^*)$ ) is over a reasonable range of non-dimensionalized  
 240  $\{p_A, p_B\}$  (see Appendix B for the detail).  $k^*$  (or  $f^*$ ) increases, as  $r_A$  and/or  $s_B$  increases and as  $s_A$   
 241 and/or  $r_B$  increases.

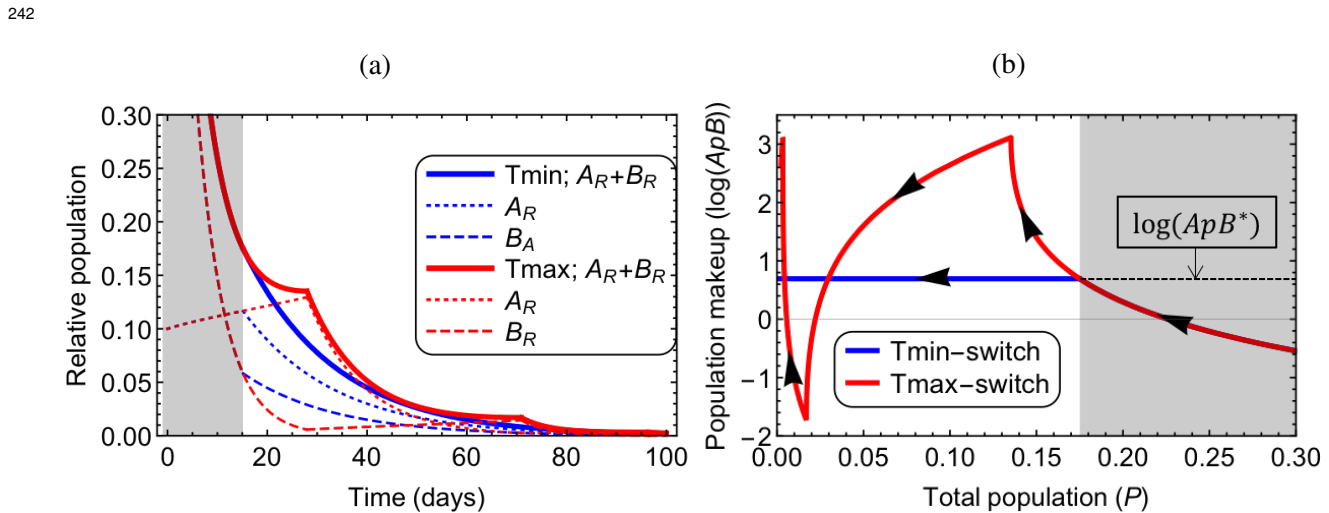

Figure 10: Comparison between dynamical trajectories of the optimal ( $T_{min}$  switch; blue curves) and a non-optimal ( $T_{max}$  switch; red curves) therapeutic strategies. Part of curves over Stage 1 and Stage 2 are drawn in gray and white backgrounds respectively. Parameters/conditions:  $\{s_A, s_B\} = \{-0.18, -0.09\}/\text{day}$ ,  $\{r_A, r_B\} = \{0.008, 0.016\}/\text{day}$ ,  $\{g_A, g_B\} = \{0.00075, 0.00125\}/\text{day}$  and  $\{A_R^0, B_R^0\} = \{0.1, 0.9\}$

243 Figure 10 shows examples of population curves with the optimal strategy ( $T_{min}$  switch) and  
 244 one non-optimal strategy ( $T_{max}$  switch) using the same choice of parameters/conditions. The vi-  
 245 sual comparison validates the better effect of the optimal strategy than the other strategy over a  
 246 range of time (see Figure 10 (a)). Figure 10 (b) shows the typical pattern of  $ApB$  in the optimal  
 247 therapy compared to the other, which is monotonically changing toward  $ApB^*$  in the first stage and  
 248 staying still in the second stage.

249  
 250 For the sake of practicality of clinical application, instantaneous drug switch in Stage 2 could  
 251 be approximated by high frequency switching with  $\Delta t \gtrsim 0$  along with the corresponding  $k(\Delta t)$   
 252 from (9), or  $k^*$  (10) independent from  $\Delta t$ . Expectedly, the smaller  $\Delta t$  is chosen, the closer to the  
 253 ideal case with  $\Delta t = 0$  (see Appendix C for the details).

254  
 255 Additionally, we have proved that the effect of instantaneous drug switch, with an arbitrary  
 256 ratio in duration between two drugs ( $k$ ), is consistent to the effect of mixed drug with relative  
 257 dosage ratio which is also  $k$  (Theorem A.8 in Appendix). The theorem is used in the derivation  
 258 of differential system/solution of optimal strategy (Theorem A.11 in Appendix). According to the  
 259 results, in Stage 2 of optimal regimen, all types of populations,  $A_R$ ,  $B_R$  and  $A_R + B_R$ , change with  
 260 a same constant proliferation rate,

$$261 \quad \lambda = \frac{r_A r_B - s_A s_B}{r_A + r_B - s_A - s_B}.$$

## 262 4 Stochastic studies on eradication time

263 In previous sections we utilized an entirely deterministic model of cancer. Cancers, however, are  
 264 not deterministic, and without stochasticity in our system we could not model an important part

265 of cancer treatment: extinction. We therefore constructed a simple individual based model using a  
 266 Gillespie algorithm to study this aspect of cross-sensitivity.  
 267

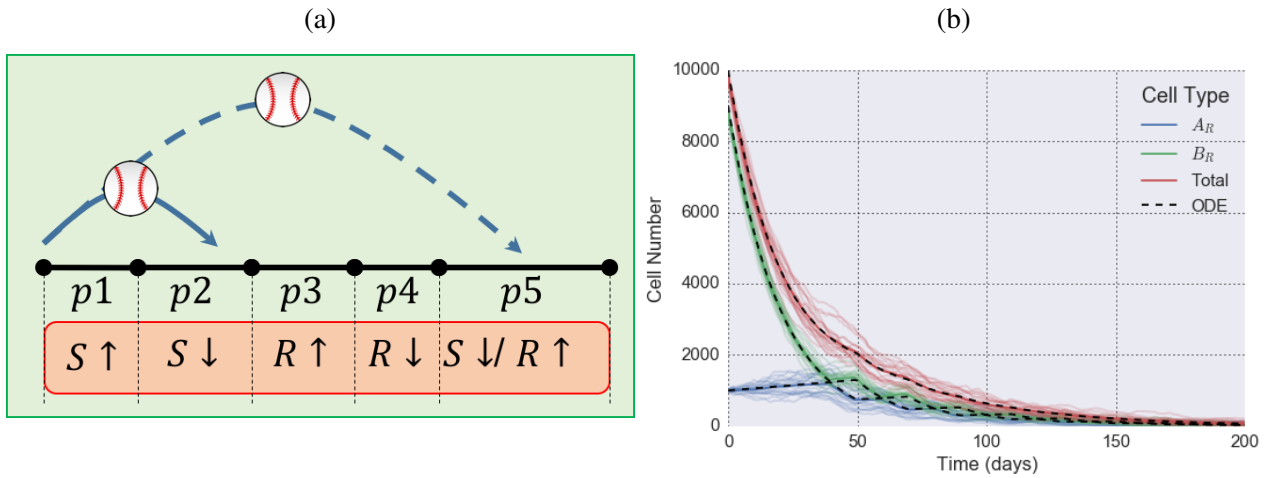

Figure 11: (a) Illustration of randomly possible events: birth or death in sensitive ( $S$ ) or resistant ( $R$ ) cell populations and transition from sensitive to resistant type.  $\{p1, p2, p3, p4, p5\}$  represent the relative probabilities of the events occurring in the stochastic model. (b) Comparison between the stochastic process and the ODE model. The mean (thick curves) of multiple stochastic simulations (thin curves) are compared to the ODE solution (dashed curves). Parameters are  $\{s_A, r_A, g_A | s_B, r_B, g_B | A_R^0, B_R^0\} = \{-0.05, 0.005, 0.0001 | -0.05, 0.005, 0.0001 | 1000, 9000\}$ , birth rate + death rate ( $I_{stoch}$ ) = 1.0.

268 Our stochastic model depends not only on net proliferation rates ( $s, r$ , see Equation (1)) but  
 269 also on the combination of birth rates ( $b_S, b_R$ ) and death rates ( $d_S, d_R$ ) where  $s = b_S - d_S$  and  
 270  $r = b_R - d_R$ . These five parameters ( $b_s, b_r, d_s, d_r, g$ ) govern the probabilities of events occurring  
 271 (Figure 11 (a)). The time at which one of these events occurs is determined by an exponential  
 272 probability distribution, and we represent the algorithm as pseudo-code thus:

273

(Step 1) Initialize  $\{S(0), R(0)\} = \{C_S^0, C_R^0\}$ .

274

(Step 2) Update from  $t$  to  $t + dt$ :

275

(random number generation)

276

$rt \sim U[0, 1], re \sim U[0, 1]$

277

$a = (b_S + d_S + g)S(t) + (b_R + d_R)R(t)$

278

$dt = -\log(rt)/a$

279

$\{p1, p2, p3, p4, p5\} = \{b_S S(t), d_S S(t), b_R R(t), d_R R(t), g S(t)\}/a$

280

281

if  $re < p1$ , then  $S(t + dt) = S(t) + 1$

282

else if  $re < p2 + p1$ , then  $S(t + dt) = S(t) - 1$

283

else if  $re < p3 + p2 + p1$ , then  $R(t + dt) = R(t) + 1$

284

else if  $re < p4 + p3 + p2 + p1$ , then  $R(t + dt) = R(t) - 1$

285

else,  $S(t + dt) = S(t) - 1$  and  $R(t + dt) = R(t) + 1$

286

287

288

(Step 3)  $t \leftarrow t + dt$  and repeat (Step 2) until a set time has passed or extinction has occurred.

289

290

291 We expanded the stochastic process for a single drug to treatment with two drugs being switched  
 292 in turn, as in our ODE system. (See Appendix D, for the details of the computational code.) Fig-  
 293 ure 11 (b) shows the consistency between the mean behavior of the stochastic model and the ODE  
 294 system.

295  
 296 Despite the generally similar patterns of population curves simulated with same  $\{s, r, g\}$ -type  
 297 of parameters and initial conditions, they are significantly different in terms of elimination time if  
 298 birth/death combinations are different. So, we studied elimination times simulated with different  
 299 combinations of birth/death rates, with a choice of fixed proliferation rates (as well as other fixed  
 300 transition rates and initial condition). We defined an index to represent different levels of birth and  
 301 death rate combinations:

$$302 \quad I_{stoch} = b_{I,J} + d_{I,J} \quad \text{for } I \in \{S, R\} \text{ and } J \in \{A, B\}$$

303 where  $I$  indicates a type of sensitivity or resistance and  $J$  does a type of drug. Given a specific net  
 304 proliferation rate ( $b_{I,J} - d_{I,J}$ ), the larger the index is, the larger both birth ( $b_{I,J}$ ) and death ( $d_{I,J}$ )  
 305 rates are.

306

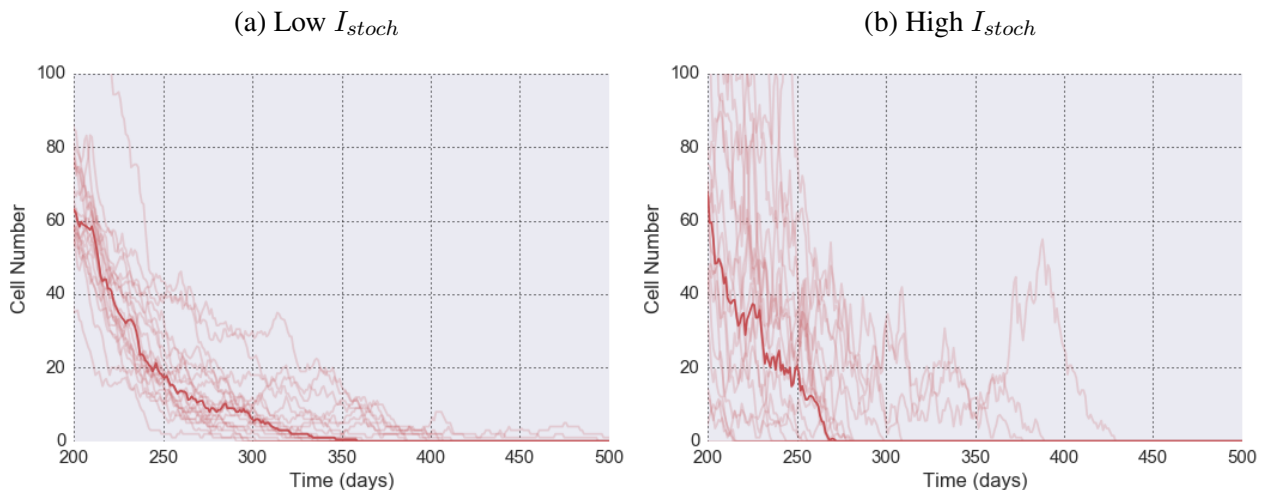

Figure 12: Comparison between stochastic simulations with different levels of birth/death combinations:  $I_{stoch} = 0.1$  (a) and  $I_{stoch} = 1.0$  (b). For each case, 20 simulated cell number histories are shown in thin curves with their median in a thick curve. Same values are used for other parameters/conditions, in both cases:  $\{s_A, r_A, g_A | s_B, r_B, g_B | A_R^0, B_R^0\} = \{-0.05, 0.005, 0.0001 | -0.05, 0.005, 0.0001 | 1000, 9000\}$ .

307 Increased  $I_{stoch}$  result in larger fluctuations (Figure 12 (b)), these fluctuations then increase the  
 308 probability of reaching an absorbing state, in this case extinction. The relationship between  $I_{stoch}$   
 309 and extinction time is shown in Figure 13. The relationship is significant ( $p < 0.05$  and  $r^2 = 0.1726$   
 310 with slope = -93.68 days<sup>2</sup>).

## 311 5 Conclusions and discussion

312 The emergence of resistance to our presently best therapies is a sad, and conserved reality in the  
 313 oncology clinics today. While much effort has been put into novel drug discovery to combat this,  
 314 there is also a growing interest in determining optimal sequences, or cycles of drugs that induce

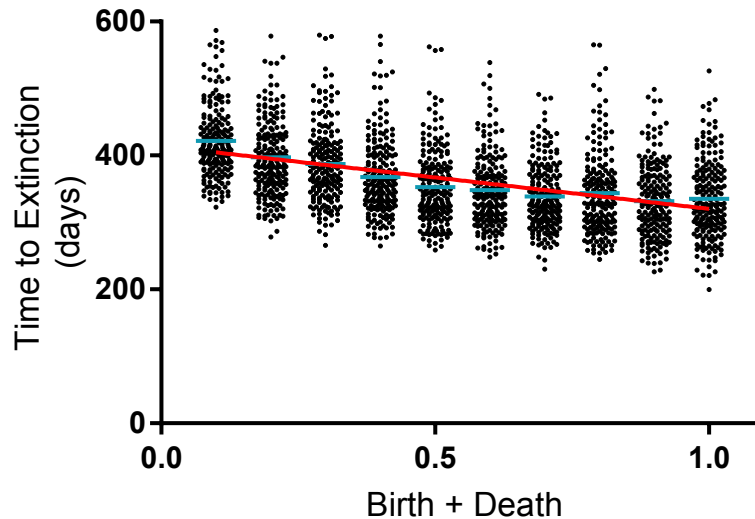

Figure 13: Relationship between birth-death combinations ( $I_{stoch}$ ; 0.1 to 1.0 with intervals of 0.1) and simulated extinction time in 200 replicates. Parameters are  $\{s_A, r_A, g_A | s_B, r_B, g_B | A_R^0, B_R^0\} = \{-0.05, 0.005, 0.0001 | -0.05, 0.005, 0.0001 | 1000, 9000\}$ . Regression (red line) is  $y = -93.68x + 414$  (slope has  $p < 0.05$  and  $r^2 = 0.1726$ ). Cyan lines show mean values.

315 continued (or collateral) sensitivity. To study this second scenario, we proposed a simple dynamical systems model of tumor evolution in a heterogeneous tumor composed of two cell phenotypes.  
316 While in reality, cell phenotype can be defined in many ways, here we completely describe it by  
317 considering only sensitivity (or resistance) to a pair of collaterally sensitive drugs, which is en-  
318 coded in their differential growth rates in specific conditions. While the resulting mathematical  
319 model conveys only simple, but essential, features of cell population dynamics, it does yield ana-  
320 lytical solutions that more complex models can not.  
321

322  
323 Our original motivation was to consider more complicated sequences, or cycles of drug therapy,  
324 however, the model presented herein is difficult to apply for an expanded system of more than two  
325 drugs. On the other hand, the cell classification used by other [11, 12, 21, 22, 25] considers sen-  
326 sitivity and resistance independently, or even specifically to a given, abstracted, genotype [26, 27].  
327 Therefore, in case of 2 drugs, there are  $2^2 = 4$  groups, (i) sensitive to both drugs, (ii) and (iii)  
328 resistant to only one drug, and (iv) resistant to both drugs. This formulation could be expanded and  
329 applied to more than two drugs [11, 25], and we will consider it in future work.  
330

331 The simplicity of our exponential growth/decay model is owing to the assumption of a constant  
332 growth rate. Use of exponential growth is likely not overly inappropriate, as we are most interested  
333 in the development of resistance – and resistance is typically thought to begin when tumor bur-  
334 den is much smaller than carrying capacity. However, the assumption might have oversimplified  
335 patterns of cell growth, which is assumed to be non-exponential by others (e.g. logistic growth  
336 [24, 28, 29]), due to the limited space and resource of human body for tumor growth, as well as  
337 increasing levels of resistance (increasing growth rates) in the face of continued selective pres-  
338 sure [30]. We will consider the concept of changing growth rate in terms of time and population  
339 density, and explore its effect on our analytical results (like  $T_{gap}$ ,  $ApB^*$ ,  $k^*$  and etc.) in future work.  
340

341 We provided a strategy of drug-switch which can yield the theoretically best possible effect in

342 decreasing cell populations. The strategy is defined explicitly in terms of these parameters relevant  
343 to the used drugs, so the usefulness of our analytic results are challenged by the availability of drug  
344 parameters. Drug parameters for several drugs are known based on *in vitro* experiment or clinical  
345 studies [31, 32]. However, it is not available for all drugs, and even the results measured *in vitro*  
346 would likely change from one patient to the next. Because of this, we propose focusing our future  
347 work on learning to parameterize models of this type from individual patient response data. Ex-  
348 amples of parameterizing patient response from imaging [33] as well as blood based markers [34]  
349 already exist, suggesting this is a reasonable goal in the near term.

350  
351 In our optimized treatment regimen we must first apply *DrugA* (if *DrugA* is better at the ini-  
352 tial time, i.e.,  $ApB(0) < ApB^*$ ; see Figure 8). Surprisingly the ideal treatment course switches to  
353 *DrugB* while *DrugA* is still effective at reducing total population. Since treatment should ideally  
354 switch before the tumor relapses our study justifies the search for techniques that either identify or  
355 predict resistance mechanisms early. Our study also argues against the opposite extreme, wherein  
356 resistant cells are targeted at the beginning of treatment. The preponderance of cells sensitive to  
357 the standard of care makes this treatment initially ideal, and does not preclude eventual success in  
358 our model. Further, the rapid tumor size reduction associated with targeting the larger, sensitive,  
359 population first could be clinically meaningful.

360  
361 Our stochastic model allowed us to explore the contributions of cell birth and death separately,  
362 as opposed to the ODE which could only consider the net growth rate. These parameters can be  
363 altered in cancer since cancer treatments have various cytostatic and cytotoxic effects, and therefore  
364 different treatments can have different effects on death and birth. In our model, increasing the total  
365 birth and death rate (as opposed to the net growth rate) caused extinction earlier in time (Figure  
366 12, Figure 13). This can be explained by the fact that extinction is the only absorbing state in our  
367 model, and therefore higher death rates determine when extinction occurs, even when birth rates  
368 are also higher. Our stochastic model therefore suggests that highly cytotoxic drugs (even those  
369 with correspondingly minimal cytostatic effects) are more effective at eliminating tumors, at least  
370 when the tumor population is small.

371  
372 Other possible ideas of future work involve comparison between different models. A recent  
373 area of debate concerns whether cycling, or directly mixing therapies is superior. In our simplified  
374 model, we show under certain regimes of (timing of) drug switching, the effect of drug cycling and  
375 drug mixing strategies are equivalent (Theorem A.8). Further exploring the ramifications of this  
376 through modeling of timing and combinations would be of value [35, 36].

377  
378 In summary, we have presented a simple model of a heterogeneous two phenotype tumour  
379 with evolution between resistant and sensitive states. We derive exact analytic solutions for tu-  
380 mor response in temporally changing drug conditions and find an optimal regimen which involves  
381 drug switching after a specific, critical time point, which critically, occurs before resistance would  
382 normally be clinically evident. While our model is highly simplified, we have identified several  
383 opportunities to improve our understanding and treatment of drug resistance, and also future op-  
384 portunities for new modelling endeavors.

## 385 References

- 386 [1] C. Holohan, S. Van Schaeybroeck, D. B. Longley, and P. G. Johnston, “Cancer drug resistance:  
387 an evolving paradigm,” *Nature reviews. Cancer*, vol. 13, no. 10, p. 714, 2013.

- 388 [2] R. J. Gillies, D. Verduzco, and R. A. Gatenby, “Evolutionary dynamics unifies carcinogenesis  
389 and cancer therapy,” *Nature reviews. Cancer*, vol. 12, no. 7, p. 487, 2012.
- 390 [3] N. Amirouchene-Angelozzi, C. Swanton, and A. Bardelli, “Tumor evolution as a therapeutic  
391 target,” *Cancer Discovery*, vol. 7, no. 8, pp. 805–817, 2017.
- 392 [4] M.-T. Dimanche-Boitrel, C. Garrido, and B. Chauffert, “Kinetic resistance to anticancer  
393 agents,” *Cytotechnology*, vol. 12, no. 1-3, pp. 347–356, 1993.
- 394 [5] A. Thomas, S. El Roubi, J. C. Reed, S. Krajewski, R. Silber, M. Potmesil, and E. W. New-  
395 comb, “Drug-induced apoptosis in b-cell chronic lymphocytic leukemia: relationship between  
396 p53 gene mutation and bcl-2/bax proteins in drug resistance.,” *Oncogene*, vol. 12, no. 5,  
397 pp. 1055–1062, 1996.
- 398 [6] C. Scheel and R. A. Weinberg, “Phenotypic plasticity and epithelial-mesenchymal transitions  
399 in cancer and normal stem cells?,” *International journal of cancer*, vol. 129, no. 10, pp. 2310–  
400 2314, 2011.
- 401 [7] D. J. Hutchison, “Cross resistance and collateral sensitivity studies in cancer chemotherapy,”  
402 *Advances in cancer research*, vol. 7, pp. 235–350, 1963.
- 403 [8] A. Dhawan, D. Nichol, F. Kinose, M. E. Abazeed, A. Marusyk, E. B. Haura, and J. G. Scott,  
404 “Collateral sensitivity networks reveal evolutionary instability and novel treatment strategies  
405 in alk mutated non-small cell lung cancer,” *Scientific Reports*, vol. 7, 2017.
- 406 [9] L. Imamovic and M. O. Sommer, “Use of collateral sensitivity networks to design drug cycling  
407 protocols that avoid resistance development,” *Science translational medicine*, vol. 5, no. 204,  
408 pp. 204ra132–204ra132, 2013.
- 409 [10] D. Nichol, J. Rutter, C. Bryant, P. Jeavons, A. Anderson, R. Bonomo, and J. Scott, “Collateral  
410 sensitivity is contingent on the repeatability of evolution,” *bioRxiv*, p. 185892, 2017.
- 411 [11] C. Tomasetti and D. Levy, “An elementary approach to modeling drug resistance in cancer,”  
412 *Mathematical biosciences and engineering: MBE*, vol. 7, no. 4, p. 905, 2010.
- 413 [12] J. Goldie and A. Coldman, “Quantitative model for multiple levels of drug resistance in clinical  
414 tumors.,” *Cancer treatment reports*, vol. 67, no. 10, pp. 923–931, 1983.
- 415 [13] N. L. Komarova and D. Wodarz, “Evolutionary dynamics of mutator phenotypes in cancer,”  
416 *Cancer Research*, vol. 63, no. 20, pp. 6635–6642, 2003.
- 417 [14] J. Goldie, “Rationale for the use of alternating non-cross-resistant chemotherapy,” *Cancer  
418 Treat Rep*, vol. 66, pp. 439–449, 1982.
- 419 [15] E. Gaffney, “The application of mathematical modelling to aspects of adjuvant chemotherapy  
420 scheduling,” *Journal of mathematical biology*, vol. 48, no. 4, pp. 375–422, 2004.
- 421 [16] E. Gaffney, “The mathematical modelling of adjuvant chemotherapy scheduling: incorpo-  
422 rating the effects of protocol rest phases and pharmacokinetics,” *Bulletin of mathematical  
423 biology*, vol. 67, no. 3, pp. 563–611, 2005.
- 424 [17] E. A. Boston and E. A. Gaffney, “The influence of toxicity constraints in models of chemother-  
425 apeutic protocol escalation,” *Mathematical medicine and biology: a journal of the IMA*,  
426 vol. 28, no. 4, pp. 357–384, 2011.



- 427 [18] J. G. Scott, A. G. Fletcher, A. R. Anderson, and P. K. Maini, “Spatial metrics of tumour vas-  
428 cular organisation predict radiation efficacy in a computational model,” *PLoS computational*  
429 *biology*, vol. 12, no. 1, p. e1004712, 2016.
- 430 [19] K. A. Rejniak, “A single-cell approach in modeling the dynamics of tumor microregions,”  
431 *Math. Biosci. Eng.*, vol. 2, no. 3, pp. 643–655, 2005.
- 432 [20] J.-H. Chen, Y.-H. Kuo, and H. P. Luh, “Optimal policies of non-cross-resistant chemotherapy  
433 on goldie and coldmans cancer model,” *Mathematical biosciences*, vol. 245, no. 2, pp. 282–  
434 298, 2013.
- 435 [21] A. A. Katouli and N. L. Komarova, “The worst drug rule revisited: mathematical modeling  
436 of cyclic cancer treatments,” *Bulletin of mathematical biology*, vol. 73, no. 3, pp. 549–584,  
437 2011.
- 438 [22] J. Goldie and A. Coldman, “A mathematic model for relating the drug sensitivity of tumors  
439 to their spontaneous mutation rate.,” *Cancer treatment reports*, vol. 63, no. 11-12, pp. 1727–  
440 1733, 1979.
- 441 [23] A. Coldman and J. Goldie, “A model for the resistance of tumor cells to cancer chemothera-  
442 peutic agents,” *Mathematical Biosciences*, vol. 65, no. 2, pp. 291–307, 1983.
- 443 [24] P. Gerlee, “The model muddle: in search of tumor growth laws,” *Cancer research*, vol. 73,  
444 no. 8, pp. 2407–2411, 2013.
- 445 [25] J. H. Goldie and A. J. Coldman, *Drug resistance in cancer: mechanisms and models*. Cam-  
446 bridge University Press, 2009.
- 447 [26] N. L. Komarova and D. Wodarz, “Drug resistance in cancer: principles of emergence and pre-  
448 vention,” *Proceedings of the National Academy of Sciences of the United States of America*,  
449 vol. 102, no. 27, pp. 9714–9719, 2005.
- 450 [27] D. Nichol, P. Jeavons, A. G. Fletcher, R. A. Bonomo, P. K. Maini, J. L. Paul, R. A. Gatenby,  
451 A. R. Anderson, and J. G. Scott, “Steering evolution with sequential therapy to prevent the  
452 emergence of bacterial antibiotic resistance,” *PLoS computational biology*, vol. 11, no. 9,  
453 p. e1004493, 2015.
- 454 [28] S. J. Berry, D. S. Coffey, P. C. Walsh, and L. L. Ewing, “The development of human benign  
455 prostatic hyperplasia with age,” *The Journal of urology*, vol. 132, no. 3, pp. 474–479, 1984.
- 456 [29] N. C. Atuegwu, L. R. Arlinghaus, X. Li, A. B. Chakravarthy, V. G. Abramson, M. E. Sanders,  
457 and T. E. Yankeelov, “Parameterizing the logistic model of tumor growth by dw-mri and  
458 dce-mri data to predict treatment response and changes in breast cancer cellularity during  
459 neoadjuvant chemotherapy,” *Translational oncology*, vol. 6, no. 3, pp. 256–264, 2013.
- 460 [30] J. Scott and A. Marusyk, “Somatic clonal evolution: A selection-centric perspective,”  
461 *Biochimica et Biophysica Acta (BBA)-Reviews on Cancer*, vol. 1867, no. 2, pp. 139–150,  
462 2017.
- 463 [31] T. L. Jackson and H. M. Byrne, “A mathematical model to study the effects of drug resistance  
464 and vasculature on the response of solid tumors to chemotherapy,” *Mathematical biosciences*,  
465 vol. 164, no. 1, pp. 17–38, 2000.

- 466 [32] W. H. Wilson, J. Teruya-Feldstein, T. Fest, C. Harris, S. M. Steinberg, E. S. Jaffe, and M. Raf-  
 467 feld, “Relationship of p53, bcl-2, and tumor proliferation to clinical drug resistance in non-  
 468 hodgkin9s lymphomas,” *Blood*, vol. 89, no. 2, pp. 601–609, 1997.
- 469 [33] K. R. Swanson, R. C. Rockne, J. Claridge, M. A. Chaplain, E. C. Alvord, and A. R. Anderson,  
 470 “Quantifying the role of angiogenesis in malignant progression of gliomas: in silico modeling  
 471 integrates imaging and histology,” *Cancer research*, vol. 71, no. 24, pp. 7366–7375, 2011.
- 472 [34] B. Werner, J. G. Scott, A. Sottoriva, A. R. Anderson, A. Traulsen, and P. M. Altrock, “The  
 473 cancer stem cell fraction in hierarchically organized tumors can be estimated using mathe-  
 474 matical modeling and patient-specific treatment trajectories,” *Cancer research*, vol. 76, no. 7,  
 475 pp. 1705–1713, 2016.
- 476 [35] R. E. Beardmore, R. Peña-Miller, F. Gori, and J. Iredell, “Antibiotic cycling and antibiotic  
 477 mixing: which one best mitigates antibiotic resistance?,” *Molecular biology and evolution*,  
 478 vol. 34, no. 4, pp. 802–817, 2017.
- 479 [36] R. Pena-Miller and R. Beardmore, “Antibiotic cycling versus mixing: the difficulty of using  
 480 mathematical models to definitively quantify their relative merits.,” 2010.

## 481 Appendix A Derivations of explicit expressions

482 **Definition**  $\mathbb{D}_A := \begin{pmatrix} r_A & g_A \\ 0 & s_A - g_A \end{pmatrix}$ ,  $\mathbb{D}_B := \begin{pmatrix} s_B - g_B & 0 \\ g_B & r_B \end{pmatrix}$ ,  $V(t) := \begin{pmatrix} A_R(t) \\ B_R(t) \end{pmatrix}$ ,

483

484  $\mathbb{M}_A(t) := \begin{pmatrix} e^{r_A t} & \frac{g_A (e^{r_A t} - e^{-(g_A - s_A) t})}{g_A + r_A - s_A} \\ 0 & e^{-(g_A - s_A) t} \end{pmatrix}$ ,  $\mathbb{M}_B(t) := \begin{pmatrix} e^{-(g_B - s_B) t} & 0 \\ \frac{g_B (e^{r_B t} - e^{-(g_B - s_B) t})}{g_B + r_B - s_B} & e^{r_B t} \end{pmatrix}$ ,

485

486  $\mathbb{A}_\epsilon := \mathbb{M}_A(f \epsilon)$ ,  $\mathbb{B}_\epsilon := \mathbb{M}_B((1 - f)\epsilon)$ ,

487

488  $\min [V(t_1), V(t_2), \dots, V(t_n)] := \begin{pmatrix} \min [A_R(t_1), A_R(t_2), \dots, A_R(t_n)] \\ \min [A_R(t_1), A_R(t_2), \dots, A_R(t_n)] \end{pmatrix}$ ,

489

490  $\max [V(t_1), V(t_2), \dots, V(t_n)] := \begin{pmatrix} \max [A_R(t_1), A_R(t_2), \dots, A_R(t_n)] \\ \max [A_R(t_1), A_R(t_2), \dots, A_R(t_n)] \end{pmatrix}$ .

491 **Proposition A.1.** *Under the therapy with Drug A,*

492 
$$V'(t) = \mathbb{D}_A V(t), \quad V(t_0 + \Delta t) = \mathbb{M}_A(\Delta t) V(t_0).$$

493 *Under the therapy with Drug B,*

494 
$$V'(t) = \mathbb{D}_B V(t), \quad V(t_0 + \Delta t) = \mathbb{M}_B(\Delta t) V(t_0).$$

### 495 A.1 Differential system of instantaneous drug switch

496 **Proposition A.2.** *Both  $A_R$  and  $B_R$  are monotonic functions under either therapy. Under the pres-  
 497 ence of Drug A,  $A_R$  is increasing, and  $B_R$  is decreasing. And, under the presence of Drug B,  $A_R$  is  
 498 decreasing, and  $B_R$  is increasing.*

499 **Proposition A.3.**  $\mathbb{A}_\epsilon|_{\epsilon=0} = \mathbb{B}_\epsilon|_{\epsilon=0} = I_2$  for all  $0 \leq f \leq 1$

500 **Proposition A.4.**  $\left. \frac{d}{d\epsilon} \mathbb{A}_\epsilon \right|_{\epsilon=0} = f \mathbb{D}_A, \left. \frac{d}{d\epsilon} \mathbb{B}_\epsilon \right|_{\epsilon=0} = (1-f) \mathbb{D}_B$  for all  $0 \leq f \leq 1$

501 **Lemma A.5.**  $\lim_{\epsilon \rightarrow 0} \frac{\mathbb{B}_\epsilon \mathbb{A}_\epsilon - I_2}{\epsilon} = f \mathbb{D}_A + (1-f) \mathbb{D}_B$  for all  $0 \leq f \leq 1$

*Proof.*

$$\begin{aligned} \lim_{\epsilon \rightarrow 0} \frac{\mathbb{B}_\epsilon \mathbb{A}_\epsilon - I_2}{\epsilon} &= \lim_{\epsilon \rightarrow 0} \frac{\frac{d}{d\epsilon} (\mathbb{B}_\epsilon \mathbb{A}_\epsilon - I_2)}{\frac{d}{d\epsilon} \epsilon} && \text{(by L'Hospital's Rule)} \\ &= \lim_{\epsilon \rightarrow 0} \frac{\frac{d\mathbb{B}_\epsilon}{d\epsilon} \mathbb{A}_\epsilon + \mathbb{B}_\epsilon \frac{d\mathbb{A}_\epsilon}{d\epsilon}}{1} \\ &= f \mathbb{D}_A + (1-f) \mathbb{D}_B && \text{(by Propositions A.3 - A.4)} \end{aligned}$$

502 □

503 **Lemma A.6.**  $\lim_{\epsilon \rightarrow 0} \frac{(\mathbb{B}_\epsilon \mathbb{A}_\epsilon)^n - I_2}{n \epsilon} = f \mathbb{D}_A + (1-f) \mathbb{D}_B$  for any positive integer,  $n$ , and for all  
504  $0 \leq f \leq 1$

*Proof.* Let  $F(n) := \lim_{\epsilon \rightarrow 0} \frac{(\mathbb{B}_\epsilon \mathbb{A}_\epsilon)^n - I_2}{n \epsilon}$  and  $L := f \mathbb{D}_A + (1-f) \mathbb{D}_B$ .

Then, we need to prove that  $F(n) = L$  for  $n = 1, 2, 3, \dots$

If  $n = 1$ ,

$$F(n) = F(1) = L \quad \text{(by Lemma A.5)}$$

Otherwise, if  $n \geq 2$  and  $F(m) = L$  for all  $1 \leq m \leq n-1$ ,

$$\begin{aligned} F(n) &= \lim_{\epsilon \rightarrow 0} \frac{(\mathbb{B}_\epsilon \mathbb{A}_\epsilon)^n - I_2}{n \epsilon} \\ &= \lim_{\epsilon \rightarrow 0} \frac{((\mathbb{B}_\epsilon \mathbb{A}_\epsilon)^{n-1} - I_2)(\mathbb{B}_\epsilon \mathbb{A}_\epsilon) + (\mathbb{B}_\epsilon \mathbb{A}_\epsilon - I_2)}{n \epsilon} \\ &= \frac{n-1}{n} \lim_{\epsilon \rightarrow 0} \frac{((\mathbb{B}_\epsilon \mathbb{A}_\epsilon)^{n-1} - I_2)(\mathbb{B}_\epsilon \mathbb{A}_\epsilon)}{(n-1) \epsilon} + \frac{1}{n} \lim_{\epsilon \rightarrow 0} \frac{\mathbb{B}_\epsilon \mathbb{A}_\epsilon - I_2}{\epsilon} \\ &= \frac{n-1}{n} F(n-1) + \frac{1}{n} F(1) \\ &= \frac{n-1}{n} L + \frac{1}{n} L && \text{(by the inductive assumption)} \\ &= L \end{aligned}$$

505 Therefore, proved. □

506 **Lemma A.7.**  $\lim_{\epsilon \rightarrow 0} \frac{\mathbb{A}_\epsilon (\mathbb{B}_\epsilon \mathbb{A}_\epsilon)^n - I_2}{(n+f) \epsilon} = \frac{(n+1)f}{n+f} \mathbb{D}_A + \frac{n(1-f)}{n+f} \mathbb{D}_B$  for any positive integer,  $n$ , and  
507 for all  $0 \leq f \leq 1$

*Proof.* Using mathematical induction, if  $n=1$ ,

$$\begin{aligned}
& \lim_{\epsilon \rightarrow 0} \frac{\mathbb{A}_\epsilon(\mathbb{B}_\epsilon \mathbb{A}_\epsilon) - I_2}{(1+f)\epsilon} \\
&= \frac{1}{1+f} \lim_{\epsilon \rightarrow 0} \frac{\mathbb{A}_\epsilon(\mathbb{B}_\epsilon \mathbb{A}_\epsilon - I_2) + (\mathbb{A}_\epsilon - I_2)}{\epsilon} \\
&= \frac{1}{1+f} \left[ \lim_{\epsilon \rightarrow 0} \mathbb{A}_\epsilon \lim_{\epsilon \rightarrow 0} \frac{\mathbb{B}_\epsilon \mathbb{A}_\epsilon - I_2}{\epsilon} + \lim_{\epsilon \rightarrow 0} \frac{\mathbb{A}_\epsilon - I_2}{\epsilon} \right] \\
&= \frac{1}{1+f} \left[ I_2(f \mathbb{D}_A + (1-f)\mathbb{D}_B) + \frac{d}{d\epsilon} \mathbb{A}_\epsilon \Big|_{\epsilon=0} \right] \quad (\text{by Proposition A.3 and Lemma A.5}) \\
&= \frac{1}{1+f} [(f \mathbb{D}_A + (1-f)\mathbb{D}_B) + k \mathbb{D}_A] \quad (\text{by Proposition A.4}) \\
&= \frac{2f}{1+f} \mathbb{D}_A + \frac{1-f}{1+f} \mathbb{D}_B \quad \text{The equality is true for } n = 1
\end{aligned}$$

If  $n \geq 2$ , and the equality works for all integers  $1 \leq m \leq n-1$ ,

$$\begin{aligned}
& \lim_{\epsilon \rightarrow 0} \frac{\mathbb{A}_\epsilon(\mathbb{B}_\epsilon \mathbb{A}_\epsilon)^n - I_2}{(n+f)\epsilon} \\
&= \frac{1}{n+f} \left[ \lim_{\epsilon \rightarrow 0} \frac{(\mathbb{A}_\epsilon(\mathbb{B}_\epsilon \mathbb{A}_\epsilon)^{n-1} - I_2)(\mathbb{B}_\epsilon \mathbb{A}_\epsilon) + (\mathbb{B}_\epsilon \mathbb{A}_\epsilon - I_2)}{\epsilon} \right] \\
&= \frac{1}{n+f} \left[ ((n-1)+f) \lim_{\epsilon \rightarrow 0} \frac{(\mathbb{A}_\epsilon(\mathbb{B}_\epsilon \mathbb{A}_\epsilon)^{n-1} - I_2)}{((n-1)+f)\epsilon} \lim_{\epsilon \rightarrow 0} (\mathbb{B}_\epsilon \mathbb{A}_\epsilon) + \lim_{\epsilon \rightarrow 0} \frac{\mathbb{B}_\epsilon \mathbb{A}_\epsilon - I_2}{\epsilon} \right] \\
&= \frac{1}{n+f} \left[ ((n-1)+f) \left( \frac{nf}{(n-1)+f} \mathbb{D}_A + \frac{(n-1)(1-f)}{(n-1)+f} \mathbb{D}_B \right) (I_2 I_2) \right. \\
&\quad \left. + (f \mathbb{D}_A + (1-f)\mathbb{D}_B) \right] \\
&\quad (\text{by the inductive assumption and Proposition A.3 and Lemma A.5}) \\
&= \frac{(n+1)f}{n+f} \mathbb{D}_A + \frac{n(1-f)}{n+f} \mathbb{D}_B \quad (\text{The equality is true for } n \geq 2)
\end{aligned}$$

508 Therefore, proved. □

509 **Theorem A.8.** *If Drug A and Drug B are prescribed in turn with relative intensity  $f$  and  $1-f$ ,*  
510 *and are switched instantaneously,  $V$  obeys*

$$511 \quad \frac{dV}{dt} = (f \mathbb{D}_A + (1-f)\mathbb{D}_B)V$$

*Proof.* For any time point  $t_0$ , let us define  $V_\epsilon(t)$  as a vector-valued function of  $A_R(t)$  and  $B_R(t)$  describing cell population dynamics under periodic therapy started on  $t_0$  with *DrugA* assigned on  $t_0+m\epsilon \leq t < t_0+(m+f)\epsilon$  and *DrugB* on  $t_0+(m+f)\epsilon \leq t < t_0+(m+1)\epsilon$  for  $m = 0, 1, 2, 3, \dots$ . Then, by Proposition A.1 and the definitions of  $\mathbb{A}$  and  $\mathbb{B}$ ,

$$V_\epsilon(t_0+m\epsilon) = (\mathbb{B}_\epsilon \mathbb{A}_\epsilon)^m V(t_0), \quad V_\epsilon(t_0+(m+f)\epsilon) = \mathbb{A}_\epsilon(\mathbb{B}_\epsilon \mathbb{A}_\epsilon)^m V(t_0) \quad \dots (*1)$$

where  $V(t_0) = \begin{pmatrix} A_R(t_0) \\ B_R(t_0) \end{pmatrix}$ . And,  $V_0(t)$  represents instantaneous drug switch.

For any  $\Delta t > 0$  and any positive integer  $n$ , there exists  $\epsilon = \epsilon(n, \Delta t)$  such that

$$\frac{\Delta t}{n+1} < \epsilon \leq \frac{\Delta t}{n} \quad \text{or} \quad 1 \leq \frac{\Delta t}{n\epsilon} < 1 + \frac{1}{n}.$$

Then by the squeeze theorem,

$$\lim_{\Delta t \rightarrow 0} \epsilon(n, \Delta t) = 0 \text{ for any positive integer } n, \text{ and } \lim_{n \rightarrow \infty} \frac{\Delta t}{n \epsilon(n, \Delta t)} = 1 \text{ for any } \Delta t > 0. \quad \dots (*2)$$

For such  $\Delta t$ ,  $n$  and  $\epsilon(n, \Delta t)$ ,  $V_\epsilon(t_0 + \Delta t)$  is bounded, since local extrema can occur only at which drugs switch by Proposition A.2. That is,

$$\begin{aligned} \min [V_\epsilon(t_0 + n \epsilon), V_\epsilon(t_0 + (n + f)\epsilon), V_\epsilon(t_0 + (n + 1)\epsilon)] &\leq V_\epsilon(t_0 + \Delta t) \\ &\leq \max [V_\epsilon(t_0 + n \epsilon), V_\epsilon(t_0 + (n + f)\epsilon), V_\epsilon(t_0 + (n + 1)\epsilon)], \end{aligned} \quad \dots (*3)$$

Also,

$$\begin{aligned} &\lim_{\Delta t \rightarrow 0} \frac{\lim_{n \rightarrow \infty} V_{\epsilon(n, \Delta t)}(t_0 + n \epsilon(n, \Delta t)) - V(t_0)}{\Delta t} \\ &= \lim_{\Delta t \rightarrow 0} \lim_{n \rightarrow \infty} \frac{(\mathbb{B}_\epsilon \mathbb{A}_\epsilon)^n - I_2}{\Delta t} V(t_0) \quad \text{(by (*1))} \\ &= \frac{\lim_{\Delta t \rightarrow 0} \lim_{n \rightarrow \infty} [(\mathbb{B}_\epsilon \mathbb{A}_\epsilon)^n - I_2] / (n \epsilon)}{\lim_{\Delta t \rightarrow 0} \lim_{n \rightarrow \infty} \Delta t / (n \epsilon)} V(t_0) \\ &= \frac{\lim_{n \rightarrow \infty} [\lim_{\Delta t \rightarrow 0} [(\mathbb{B}_\epsilon \mathbb{A}_\epsilon)^n - I_2] / (n \epsilon)]}{\lim_{\Delta t \rightarrow 0} [\lim_{n \rightarrow \infty} \Delta t / (n \epsilon)]} V(t_0) \\ &= \frac{\lim_{n \rightarrow \infty} [\lim_{\epsilon \rightarrow 0} [(\mathbb{B}_\epsilon \mathbb{A}_\epsilon)^n - I_2] / (n \epsilon)]}{\lim_{\Delta t \rightarrow 0} 1} V(t_0) \quad \text{by (*2)} \\ &= \lim_{n \rightarrow \infty} [f \mathbb{D}_A + (1 - f) \mathbb{D}_B] V(t_0) \quad \text{(by Lemma A.6)} \\ &= (f \mathbb{D}_A + (1 - f) \mathbb{D}_B) V(t_0). \quad \dots (*4) \end{aligned}$$

And,

$$\begin{aligned} &\lim_{\Delta t \rightarrow 0} \frac{\lim_{n \rightarrow \infty} V_{\epsilon(n, \Delta t)}(t_0 + (n + f) \epsilon(n, \Delta t)) - V(t_0)}{\Delta t} \\ &= \lim_{\Delta t \rightarrow 0} \lim_{n \rightarrow \infty} \frac{\mathbb{A}_\epsilon (\mathbb{B}_\epsilon \mathbb{A}_\epsilon)^n - I_2}{\Delta t} V(t_0) \quad \text{(by (*1))} \\ &= \frac{\lim_{\Delta t \rightarrow 0} \lim_{n \rightarrow \infty} [\mathbb{A}_\epsilon (\mathbb{B}_\epsilon \mathbb{A}_\epsilon)^n - I_2] / ((n + f) \epsilon)}{\lim_{\Delta t \rightarrow 0} \lim_{n \rightarrow \infty} \Delta t / ((n + f) \epsilon)} V(t_0) \\ &= \frac{\lim_{n \rightarrow \infty} [\lim_{\Delta t \rightarrow 0} [(\mathbb{B}_\epsilon \mathbb{A}_\epsilon)^n - I_2] / ((n + f) \epsilon)]}{\lim_{\Delta t \rightarrow 0} [\lim_{n \rightarrow \infty} (\Delta t / (n \epsilon)) (n / (n + f))]} V(t_0) \\ &= \frac{\lim_{n \rightarrow \infty} [\lim_{\epsilon \rightarrow 0} [(\mathbb{B}_\epsilon \mathbb{A}_\epsilon)^n - I_2] / ((n + f) \epsilon)]}{\lim_{\Delta t \rightarrow 0} 1} V(t_0) \quad \text{by (*2)} \\ &= \lim_{n \rightarrow \infty} \left[ \frac{(n + 1)f}{n + f} \mathbb{D}_A + \frac{n(1 - f)}{n + f} \mathbb{D}_B \right] V(t_0) \quad \text{(by Lemma A.7)} \\ &= (f \mathbb{D}_A + (1 - f) \mathbb{D}_B) V(t_0) \quad \dots (*5) \end{aligned}$$

Similar to (\*4),

$$\lim_{\Delta t \rightarrow 0} \frac{\lim_{n \rightarrow \infty} V_{\epsilon(n, \Delta t)}(t_0 + (n + 1) \epsilon(n, \Delta t)) - V(t_0)}{\Delta t} = (f \mathbb{D}_A + (1 - f) \mathbb{D}_B) V(t_0) \quad \dots (*6)$$

By (\*4) - (\*6),

$$\begin{aligned} & \min \left[ \lim_{\Delta t \rightarrow 0} \frac{\lim_{n \rightarrow \infty} V_\epsilon(t_0 + n \epsilon) - V(t_0)}{\Delta t}, \lim_{\Delta t \rightarrow 0} \frac{\lim_{n \rightarrow \infty} V_\epsilon(t_0 + (n + f) \epsilon) - V(t_0)}{\Delta t}, \right. \\ & \left. \lim_{\Delta t \rightarrow 0} \frac{\lim_{n \rightarrow \infty} V_\epsilon(t_0 + (n + 1) \epsilon) - V(t_0)}{\Delta t} \right] = \max \left[ \lim_{\Delta t \rightarrow 0} \frac{\lim_{n \rightarrow \infty} V_\epsilon(t_0 + n \epsilon) - V(t_0)}{\Delta t}, \right. \\ & \left. \lim_{\Delta t \rightarrow 0} \lim_{\Delta t \rightarrow 0} \frac{\lim_{n \rightarrow \infty} V_\epsilon(t_0 + (n + f) \epsilon) - V(t_0)}{\Delta t}, \lim_{\Delta t \rightarrow 0} \frac{\lim_{n \rightarrow \infty} V_\epsilon(t_0 + (n + 1) \epsilon) - V(t_0)}{\Delta t} \right] \\ & = (f \mathbb{D}_A + (1 - f) \mathbb{D}_B) V(t_0) \quad \dots (*7) \end{aligned}$$

512 Then, by (\*3), (\*7) and the squeeze theorem,

$$513 \quad \left. \frac{d}{dt} V_0 \right|_{t=t_0} = \lim_{\Delta t \rightarrow 0} \frac{\lim_{n \rightarrow \infty} V_\epsilon(t_0 + \Delta t) - V(t_0)}{\Delta t} = (f \mathbb{D}_A + (1 - f) \mathbb{D}_B) V(t_0)$$

514 Therefore,

$$515 \quad \frac{dV}{dt} = (f \mathbb{D}_A + (1 - f) \mathbb{D}_B) V$$

516 □

## 517 A.2 Population dynamics with the optimal regimen

518 **Lemma A.9.**  $\left\{ \frac{r_A r_B - s_A s_B}{r_A + r_B - s_A - s_B}, \begin{pmatrix} ApB^* \\ 1 \end{pmatrix} \right\}$  is an eigen pair of  $f^* \mathbb{D}_A + (1 - f^*) \mathbb{D}_B$  with  
519  $ApB^*$  and  $f^*$  from (8), (10) and (13).

520 *Proof.* Let  $\mathbb{D}^* := f^* \mathbb{D}_A + (1 - f^*) \mathbb{D}_B$ , and  $\lambda = \frac{r_A r_B - s_A s_B}{r_A + r_B - s_A - s_B}$ . Then,

$$521 \quad \mathbb{D}^* - \lambda I_2 = C_1 \begin{pmatrix} C_2 U^T \\ C_3 U^T \end{pmatrix},$$

where  $U = \begin{pmatrix} 1 \\ -ApB^* \end{pmatrix}$  along with

$$C_1 = -(g_A(r_A - s_B) + g_B(r_B - s_A) + (r_B - s_A)(r_A - s_B))(r_A + r_B - s_A - s_B)/(r_A - s_B),$$

$$C_2 = g_A((r_A - s_B)(r_B - s_B) + g_B(r_A + r_B - s_A - s_B)),$$

$$C_3 = -g_B((r_B - s_A)(r_A - s_A) + g_A(r_A + r_B - s_A - s_B)).$$

522 Since  $U^T V = 0$  where  $V = ((r_B - s_A)/(r_A - s_B), 1)^T$ ,  $(\lambda, V)$  is an eigen pair of  $\mathbb{D}^*$ . □

523 **Theorem A.10.** In Stage 2 of the optimal strategy, both  $A_R$  and  $B_R$  changes with a constant net-  
524 proliferation rate,

$$525 \quad \lambda = \frac{r_A r_B - s_A s_B}{r_A + r_B - s_A - s_B}.$$

526 *Proof.* Without loss of generosity, let us prove it only when  $ApB(0) < ApB^*$ .

527

If  $ApB(0) < ApB^*$ , *DrugA* has a better effect initially. So following the optimal therapy scheduling, *DrugA* is assigned alone at the beginning as long as  $T_{min}^A = T_{min}(p_A, p_B, ApB(0))$  (Stage 1), and then Stage 2 starts at  $T_{min}^A$  with initial condition

$$V(T_{min}^A) = \mathbb{M}_A(T_{min}^A)V(0) = C \begin{pmatrix} ApB^* \\ 1 \end{pmatrix} \quad \dots (*1)$$

528 where  $C = \frac{P(0)}{1 + ApB(0)} \left( \frac{(r_A - s_A)(r_B - s_A) + g_A(r_A + r_B - s_A - s_B)}{(r_A - s_B)(g_A + ApB(0)(g_A + r_A - s_A))} \right)^{-\frac{g_A - s_A}{g_A + r_A - s_A}}$ .

530 By Theorem A.8, in Stage 2,  $V(t)$  obeys

531 
$$\frac{dV}{dt} = \mathbb{D}^*V, \text{ where } \mathbb{D}^* = f^*\mathbb{D}_A + (1 - f^*)\mathbb{D}_B \quad \dots (*2)$$

532 By Lemma A.9,  $V(T_{min}^A)$  is an eigenvector of  $\mathbb{D}^*$  with the corresponding eigenvalue,  $\lambda$ . Then,  
533 the solution of (\*2) with the initial value (\*1) is

534 
$$V(t + T_{min}^A) = e^{\lambda t}V(T_{min}^A).$$

535 □

536 **Theorem A.11.** *With optimal therapy utilizing DrugA and DrugB, V obeys the following equa-*  
537 *tions and solutions.*

538 *If  $ApB(0) < ApB^*$ ,*

540 
$$\frac{dV}{dt} = \begin{cases} \mathbb{D}_A V & \text{if } 0 \leq t \leq T_{min}^A \\ \lambda V & \text{if } t > T_{min}^A \end{cases} \quad \text{and } V(t) = \begin{cases} \mathbb{M}_A(t)V(0) & \text{if } 0 \leq t \leq T_{min}^A \\ e^{\lambda(t - T_{min}^A)}V(T_{min}^A) & \text{if } t > T_{min}^A \end{cases}$$

541 *Similarly if  $ApB(0) \geq ApB^*$ ,*

542 
$$\frac{dV}{dt} = \begin{cases} \mathbb{D}_B V & \text{if } 0 \leq t \leq T_{min}^B \\ \lambda V & \text{if } t > T_{min}^B \end{cases} \quad \text{and } V(t) = \begin{cases} \mathbb{M}_B(t)V(0) & \text{if } 0 \leq t \leq T_{min}^B \\ e^{\lambda(t - T_{min}^B)}V(T_{min}^B) & \text{if } t > T_{min}^B \end{cases}$$

543 *Proof.* Straightforward, by Theorem A.10 □

## 544 Appendix B Sensitivity analysis on optimal scheduling

545 The two determinant quantities of optimal control scheduling are (i) the duration of the first stage  
546 ( $T_{min}^1$ ), and (ii) the relative intensity between two drugs in the second stage ( $k^*$  or  $f^*$ ). Here, we  
547 show sensitivity analysis on the quantities related to them over a range of model parameters.

548

549 Using  $g_1$ , we non-dimensionalize all the values, like

550 
$$\{\bar{s}_1, \bar{r}_1 | \bar{s}_2, \bar{r}_2\} := \frac{1}{g_1} \{s_1, r_1 | s_2, r_2\} \quad \text{and} \quad \bar{T}_{gap} := g_1 T_{gap}$$

551 then,

$$\bar{T}_{gap}(\{\bar{s}_1, \bar{r}_1\}, \{\bar{s}_2, \bar{r}_2\}) := \frac{\ln \left[ \frac{(1 - \bar{s}_1)(\bar{r}_1 - \bar{s}_1)(\bar{r}_1 - \bar{s}_2)}{\bar{r}_1((\bar{r}_1 - \bar{s}_1)(\bar{r}_2 - \bar{s}_1) + (\bar{r}_1 + \bar{r}_2 - \bar{s}_1 - \bar{s}_2))} \right]}{1 + \bar{r}_1 - \bar{s}_1} \quad (11)$$

552 In general, cells mutate in a slower way than they proliferate (**ref**), so we ran sensitivity analysis  
 553 on  $T_{gap}$  for all  $a \gg 1$  for  $a \in \{-\bar{s}_1, -\bar{s}_2, \bar{r}_1, \bar{r}_2\}$ . Figure 14 shows  $T_{gap}$  over the range of  $20 \leq$   
 554  $-\bar{s}_1, -\bar{s}_2, \bar{r}_1, \bar{r}_2 \leq 100$ . So, under the assumption that  $g_1 \ll \min\{-s_1, -s_2, r_1, r_2\}$ ,

$$555 \quad T_{gap}(\{s_1, r_1\}, \{s_2, r_2\}) \approx \frac{\ln \left[ \frac{-s_1(r_1 - s_2)}{r_1(r_2 - s_1)} \right]}{r_1 - s_1},$$

556 which approximate the contour curves of Figure 14.

557

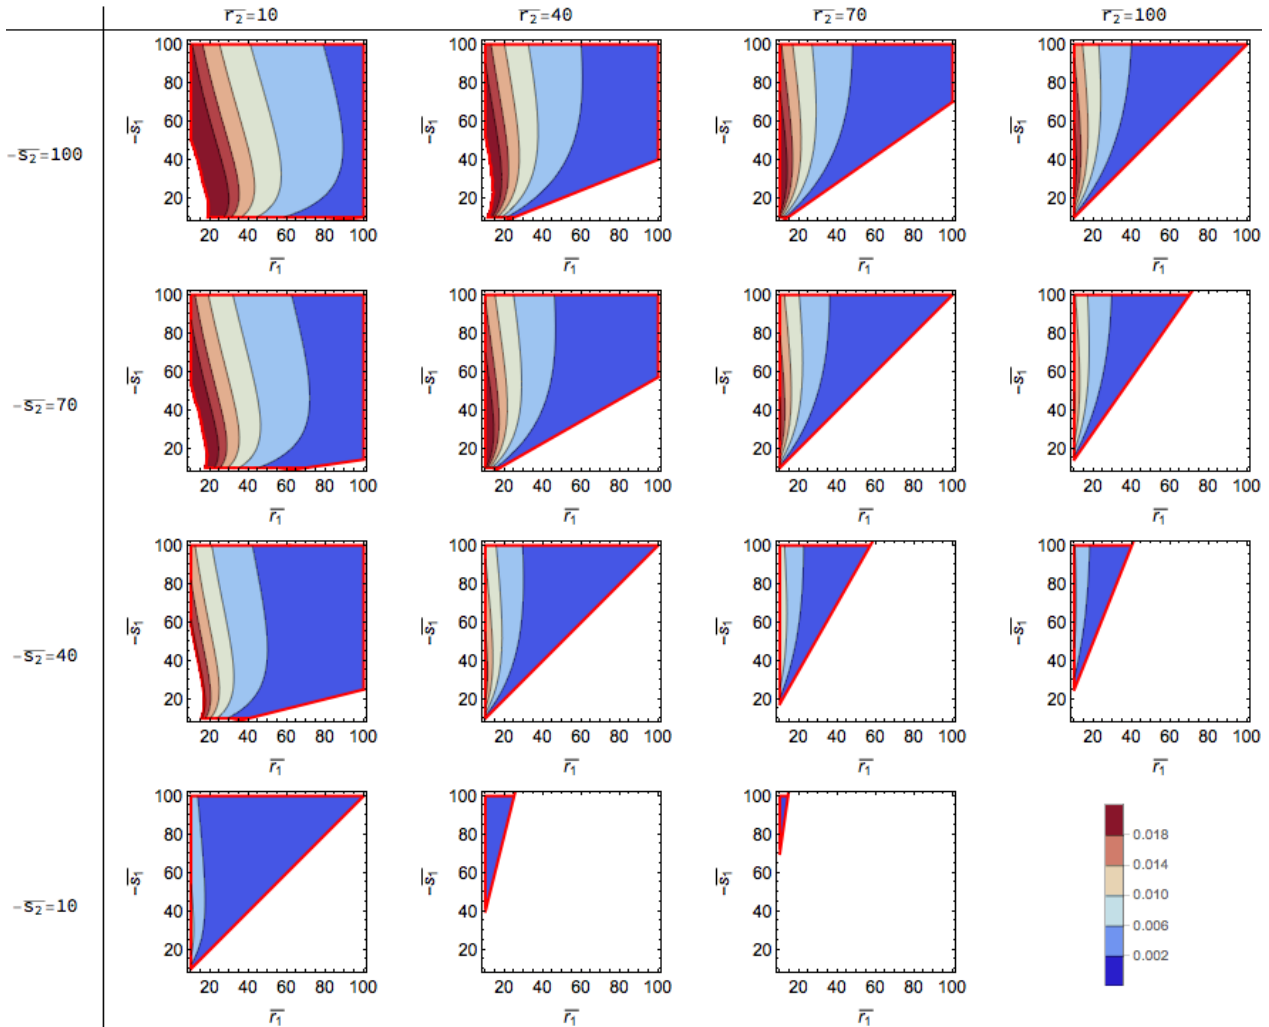

Figure 14: Contour maps of  $T_{gap}$  over ranges of  $20 \leq a \leq 100$  for  $a \in \{-s_1, -s_2, r_1, r_2\}$  and  $r_1 r_2 < s_1 s_2$  (Condition (6))

558 Regarding the regulated intensities among the two drugs,  $k^*$ , we assumed that  $g_1 \approx g_2 := g$ ,  
 559 similarly assuming that they are both much smaller than  $\{-s_1, -s_2, r_1, r_2\}$ . Then we normalized  
 560 all the parameters with the unit of  $g$ , like

$$561 \quad \{\bar{s}_1, \bar{r}_1 | \bar{s}_2, \bar{r}_2\} := \frac{1}{g} \{s_1, r_1 | s_2, r_2\}.$$

562  $k^*$  can be rewritten in terms of the dimensionless parameters.



$$k^*(\{\bar{s}_1, \bar{r}_1\}, \{\bar{s}_2, \bar{r}_2\}) = \frac{(\bar{r}_1 - \bar{s}_2)((\bar{r}_1 - \bar{s}_1)(\bar{r}_2 - \bar{s}_1) + (\bar{r}_1 + \bar{r}_2 - \bar{s}_1 - \bar{s}_2))}{(\bar{r}_2 - \bar{s}_1)((\bar{r}_2 - \bar{s}_2)(\bar{r}_1 - \bar{s}_2) + (\bar{r}_1 + \bar{r}_2 - \bar{s}_1 - \bar{s}_2))} \quad (12)$$

563 In sensitivity analysis, we use

$$f^* := \frac{k^*}{1 + k^*}, \quad (13)$$

564 which represents intensity fraction of initially better drug out of total therapy. We evaluated  $f^*$   
 565 over the same ranges of  $\{s_1, s_2, r_1, r_2\}$  like the previous exercise. (see Figure 15) Over the ranges,  
 566  $\max\{g_1, g_2\} \ll \min\{-s_1, -s_2, r_1, r_2\}$ , so  $k^*$  and  $f^*$  can be approximated by simpler forms.

567

$$k^* \approx \frac{r_1 - s_1}{r_2 - s_2} \quad \text{and} \quad f^* \approx \frac{r_1 - s_1}{r_1 + r_2 - s_1 - s_2}$$

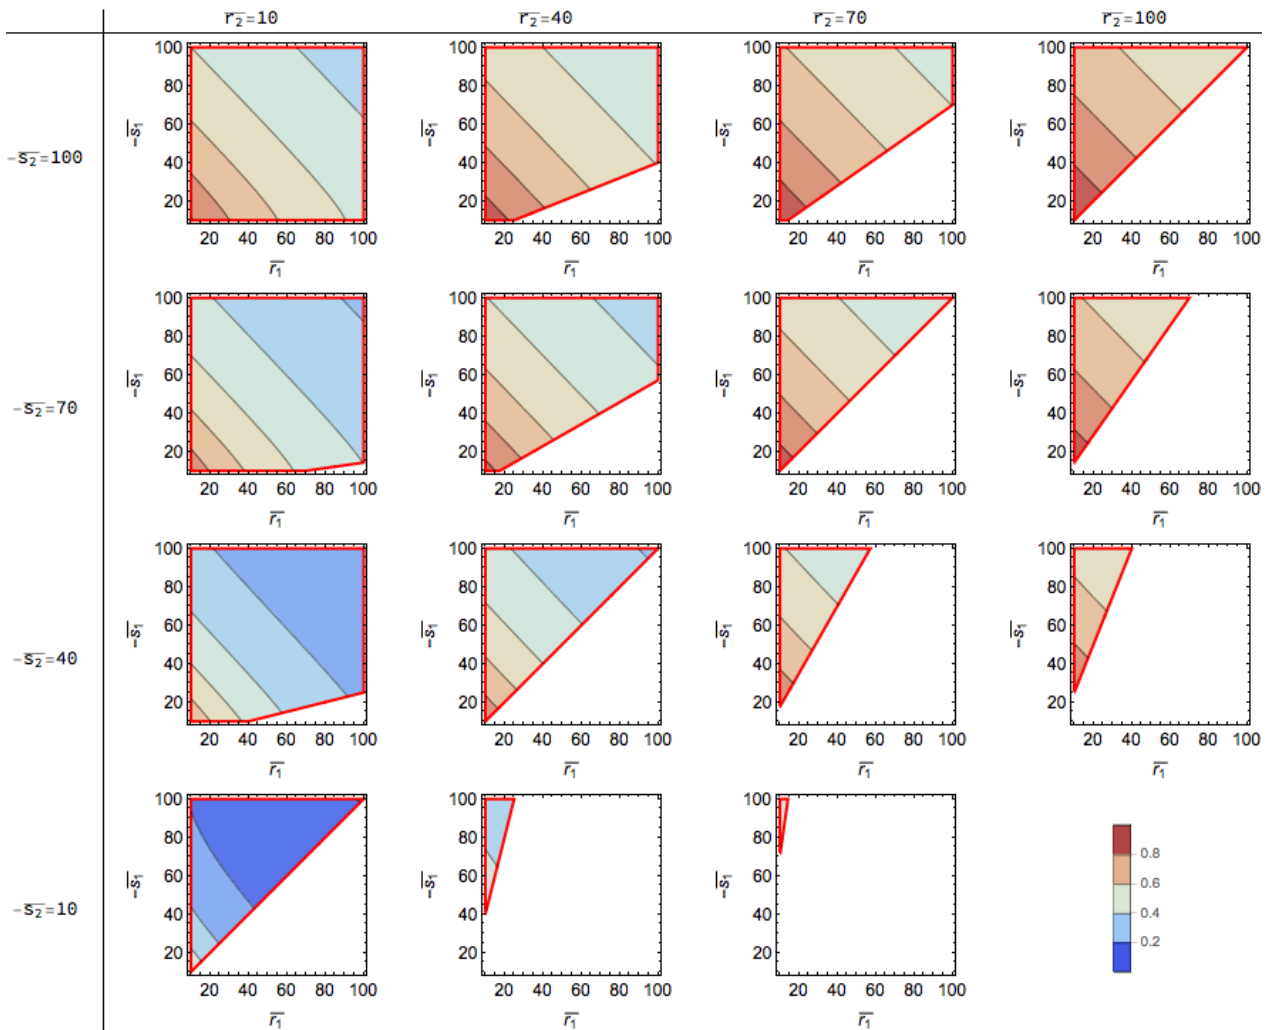

Figure 15: Contour maps of  $f^*$  over ranges of  $20 \leq a \leq 100$  for  $a \in \{-s_1, -s_2, r_1, r_2\}$  and  $r_1 r_2 < s_1 s_2$  (Condition (6))

## 568 Appendix C Clinical implementation of instantaneous switch 569 in the optimal strategy

570 In clinical practice, the instantaneous drug-switch which is proposed in this research to apply in the  
571 second stage of the optimal control is not implementable. Therefore, we studied similar schedules  
572 to the optimal case, and compared the therapy effects between the different schedules of admin-  
573 istrations. In the "similar" schedules, the first stage with an initial drug remained same to the  
574 optimal schedule, but the second part of instantaneous switch (with  $\Delta t = 0$ ) has been modified  
575 into fast switch ( $\Delta t \gtrsim 0$ ). Figure 16 shows how the effect on population with instantaneous switch  
576 ( $\Delta t = 0$ ) and fast switches (multiple choices of  $\Delta t \gtrsim 0$ ) are different for a choice of drug parameter  
577 values. Expectedly, the smaller  $\Delta t$  is chosen, the closer to the ideal case of therapy effect. And,  
578 a choice of reasonably small  $\Delta t$  (like 1 day or 3 days) results in the outcome quite close to the  
579 optimal scenario.

580  
581 We simulated same exercise with  $k^*$  (from (10)) instead of  $k(\Delta t)$  modulated by  $\Delta t$  (Figure  
582 17). Only invisibly small differences has been observed between Figure 16 and Figure 17, which  
583 justifies general usage of  $k^*$  independent from  $\Delta t$ .

584

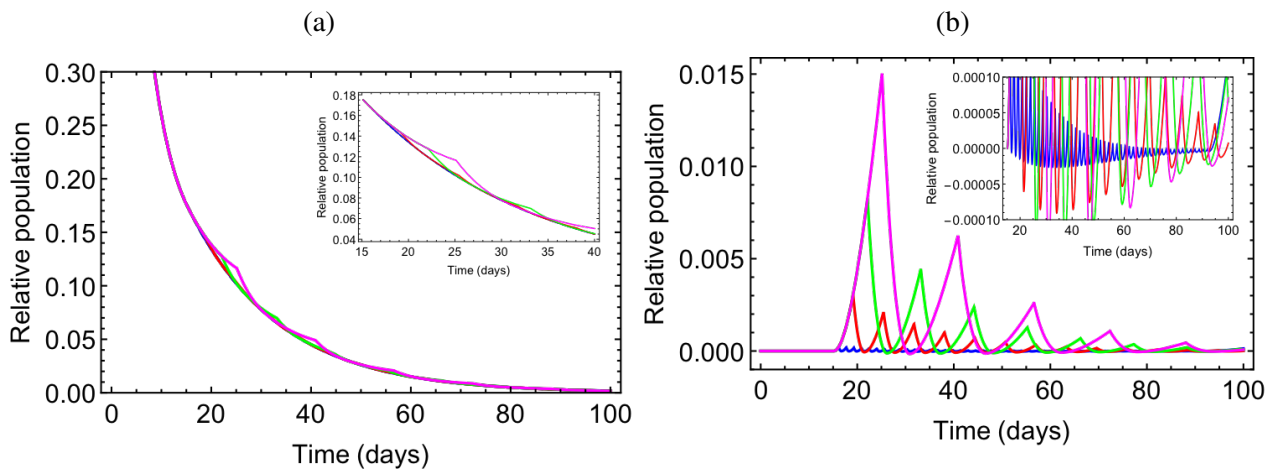

Figure 16: Graphs of regular drug switch in Stage 2 with different  $\{\Delta t, k(\Delta t, p_A, p_B)\}$ :  $\Delta t = 1$  day (blue),  $\Delta t = 4$  days (red),  $\Delta t = 7$  days (green), and  $\Delta t = 10$  days (magenta). Parameters/conditions:  $p_A = \{-0.18, 0.008, 0.00075\}$ /day,  $p_B = \{-0.9, 0.016, 0.00125\}$ /day and  $\{A_R^0, B_R^0\} = \{0.1, 0.9\}$  (a) Time histories of total populations,  $C_P^n$  for  $n \in \{1, 4, 7, 10\}$  days (b) Differences between the optimal population history  $C_P^*$ , (i.e., when  $\Delta t = 0$ ) and each cases with positive  $\Delta t$ . (i.e.,  $C_P^n - C_P^*$ ). The inside smaller plots are same types of graphs with the bigger graphs, and show enlargement of interesting ranges.

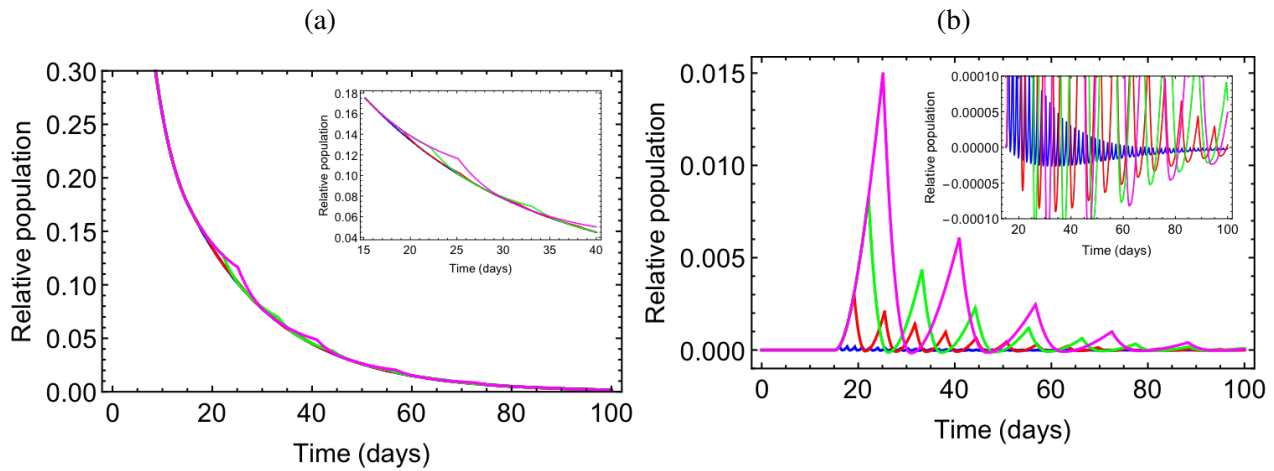

Figure 17: Graphs of regular drug switch in Stage 2 with different  $\{\Delta t\}$  and fixed  $k^*$  from 10:  $\Delta t = 1$  day (blue),  $\Delta t = 4$  days (red),  $\Delta t = 7$  days (green), and  $\Delta t = 10$  days (magenta). Parameters/conditions:  $p_A = \{-0.18, 0.008, 0.00075\}$ /day,  $p_B = \{-0.9, 0.016, 0.00125\}$ /day and  $\{A_R^0, B_R^0\} = \{0.1, 0.9\}$  (a) Time histories of total populations,  $C_P^n$  for  $n \in \{1, 4, 7, 10\}$  days (b) Differences between the optimal population history  $C_P^*$ , (i.e., when  $\Delta t = 0$ ) and each cases with positive  $\Delta t$ . (i.e.,  $C_P^n - C_P^*$ ). The inside smaller plots are same types of graphs with the bigger graphs, and show enlargement of interesting ranges.

## 585 Appendix D Stochastic simulation codes

586 The computational code written in Python will be provided at *Github* ([https://github.com/nryoon12/Optimal-](https://github.com/nryoon12/Optimal-Therapy-Scheduling-Based-on-a-Pair-of-Collaterally-Sensitive-Drugs)  
587 [Therapy-Scheduling-Based-on-a-Pair-of-Collaterally-Sensitive-Drugs](https://github.com/nryoon12/Optimal-Therapy-Scheduling-Based-on-a-Pair-of-Collaterally-Sensitive-Drugs)).
